# Supplementary material for: Cancer-related marketing centrality motifs acting as pivot units in the human signaling network and mediating cross-talk between biological pathways
Source: Royal Society of Chemistry journal article supplement (doi:10.1039/c3mb70289h), 2013-09-04

**Figure S1. Three types of cross-talks between biological pathways mediated by motifs.** (A) Three vertices of a motif are in the same pathway. (B) Three vertices of a motif are in two pathways, which are connected by one edge. (C) Three vertices of a motif are in two pathways, which are connected by two edges. The edges that may exist in the same pathway are represented in dashed lines.

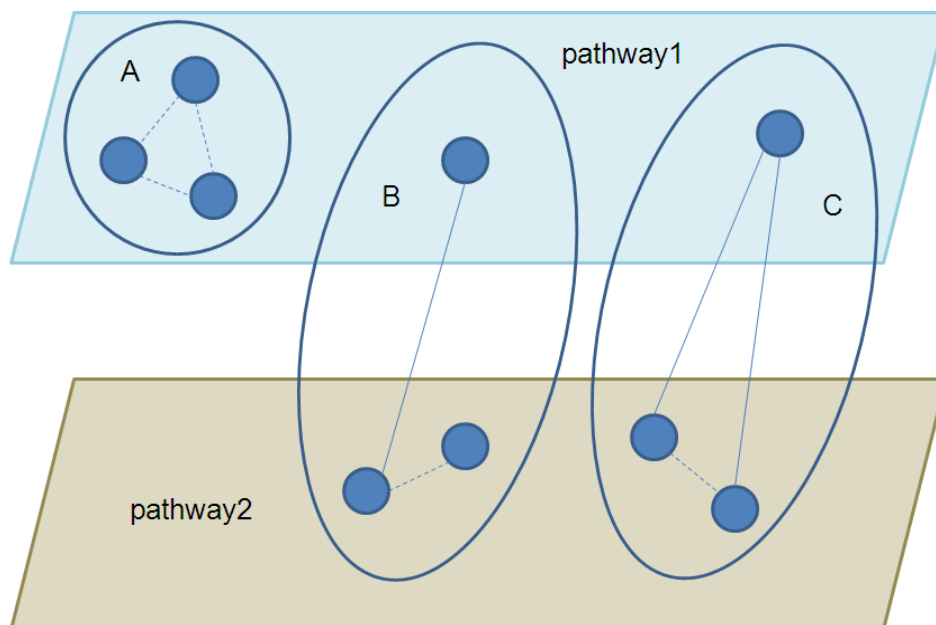

Supplement: c3mb70289h.pdf [file c3mb70289h.pdf]
