# Supplementary material for: Cancer-related marketing centrality motifs acting as pivot units in the human signaling network and mediating cross-talk between biological pathways
Source: Royal Society of Chemistry journal article supplement (doi:10.1039/c3mb70289h), 2013-09-04
Supplement: c3mb70289h_2.pdf [file c3mb70289h_2.pdf]

**Table S1. All of the identified motifs using FANMOD.**

| Motif <sup>a</sup>                                                                  | Type              | Number | Frequency <sup>b</sup> | Z-Score <sup>c</sup> | p-Value <sup>d</sup> |
|-------------------------------------------------------------------------------------|-------------------|--------|------------------------|----------------------|----------------------|
| 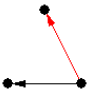   | Single input      | 25     | 0.056171%              | 2.6655               | 0                    |
|    | Chain             | 32     | 0.071899%              | 3.0889               | 0                    |
|    | Chain             | 17     | 0.038196%              | 2.0672               | 0                    |
|    | Chain             | 380    | 0.8538%                | 10.559               | 0                    |
|    | Chain             | 30     | 0.067405%              | 4.7423               | 0                    |
|   | Multiple inputs   | 11     | 0.024715%              | 21.361               | 0                    |
|  | Feed forward loop | 6      | 0.013481%              | 191.77               | 0                    |
|  | Multiple inputs   | 75     | 0.16851%               | 3.4083               | 0                    |
|  | Feed forward loop | 25     | 0.056171%              | 46.555               | 0                    |
|  | Chain             | 10     | 0.022468%              | 21.361               | 0                    |
|  | Feed forward loop | 29     | 0.065158%              | 101.56               | 0                    |
|  | Feed forward loop | 87     | 0.19547%               | 12.163               | 0                    |
|  | Feed forward loop | 25     | 0.056171%              | 5.5943               | 0                    |

|                                                                                     |                   |      |           |           |       |
|-------------------------------------------------------------------------------------|-------------------|------|-----------|-----------|-------|
|    | Feed forward loop | 28   | 0.067405% | 7.3208    | 0     |
|    | Chain             | 314  | 0.70551%  | 5.4264    | 0     |
|    | Multiple inputs   | 910  | 2.0446%   | 2.4369    | 0.002 |
|    | Multiple inputs   | 39   | 0.087627% | 2.5049    | 0     |
|    | Chain             | 155  | 0.34826%  | 2.7971    | 0     |
|    | Feed forward loop | 26   | 0.062911% | 6.6992    | 0     |
|   | Chain             | 6    | 0.013481% | 2.3094    | 0     |
|  | Feedback loop     | 9    | 0.020222% | undefined | 0     |
|  | Mixed mode        | 24   | 0.053924% | 21.361    | 0     |
|  | Mixed mode        | 6    | 0.013481% | 21.361    | 0     |
|  | Multiple inputs   | 1742 | 3.923%    | 4.0028    | 0     |
|  | Multiple inputs   | 77   | 0.17301%  | 2.2805    | 0     |
|  | Feed forward loop | 10   | 0.022468% | 2.6249    | 0.007 |
|  | Mixed mode        | 7    | 0.015728% | 21.361    | 0     |

|                                                                                    |                 |    |           |        |   |
|------------------------------------------------------------------------------------|-----------------|----|-----------|--------|---|
|   | Mixed mode      | 10 | 0.022468% | 21.361 | 0 |
|   | Mixed mode      | 18 | 0.040443% | 2.1286 | 0 |
|   | Chain           | 61 | 0.13481%  | 5.1267 | 0 |
|   | Single input    | 45 | 0.10111%  | 2.1088 | 0 |
|   | Mixed mode      | 10 | 0.022468% | 3.7899 | 0 |
|   | Mixed mode      | 7  | 0.015728% | 21.361 | 0 |
|  | Multiple inputs | 12 | 0.026962% | 21.361 | 0 |

<sup>a</sup> The vertices containing cancer genes are represented in green, and the others are represented in black. The three kinds of edges are represented by black (output), green (activation) and red (inhibition) edges, respectively.

<sup>b</sup> The frequency denotes the frequency with which a motif occurred in the original network.

<sup>c</sup> The Z-Score is the original frequency minus the random frequency divided by the standard deviation.

<sup>d</sup> The p-Value of a motif is the number of random networks in which it occurred more often than in the original network, divided by the total number of random networks. Therefore, p-Values range from 0 to 1; the smaller the p-Value, the more significant is the motif.
