# Supplementary material for: Cancer-related marketing centrality motifs acting as pivot units in the human signaling network and mediating cross-talk between biological pathways
Source: Royal Society of Chemistry journal article supplement (doi:10.1039/c3mb70289h), 2013-09-04
Supplement: c3mb70289h_3.pdf [file c3mb70289h_3.pdf]

**Table S2. Marketing centrality motifs, cancer genes and their motif types.**

| Rank <sup>a</sup> | Marketing centrality motif | Cancer genes         | Motif type <sup>b</sup>                                                                                 |
|-------------------|----------------------------|----------------------|---------------------------------------------------------------------------------------------------------|
| 1                 | m3763                      | CREB1, AKT1          |  Multiple inputs     |
| 2                 | m3296                      | CREB1, AKT1          |  Multiple inputs     |
| 3                 | m2276                      | CREB1, AKT1          |  Multiple inputs     |
| 4                 | m2573                      | PIK3CA, PIK3R1, AKT1 |  Multiple inputs     |
| 5                 | m2564                      | PIK3CA, PIK3R1, AKT1 |  Multiple inputs     |
| 6                 | m3925                      | CREB1, AKT1          |  Multiple inputs     |
| 7                 | m4089                      | PIK3CA, PIK3R1, AKT1 |  Feed forward loop   |
| 8                 | m2566                      | PIK3CA, PIK3R1, AKT1 |  Multiple inputs     |
| 9                 | m2568                      | PIK3CA, PIK3R1, AKT1 |  Multiple inputs     |
| 10                | m3748                      | BCL2, AKT1           |  Multiple inputs     |
| 11                | m2557                      | PIK3CA, PIK3R1, AKT1 |  Multiple inputs     |
| 12                | m2561                      | PIK3CA, PIK3R1, AKT1 |  Multiple inputs     |
| 13                | m2569                      | PIK3CA, PIK3R1, AKT1 |  Multiple inputs   |
| 14                | m2556                      | PIK3CA, PIK3R1, AKT1 |  Multiple inputs   |
| 15                | m2572                      | PIK3CA, PIK3R1, AKT1 |  Multiple inputs   |
| 16                | m4195                      | PIK3CA, PIK3R1, AKT1 |  Single input      |
| 17                | m2554                      | PIK3CA, PIK3R1, AKT1 |  Multiple inputs   |
| 18                | m2555                      | PIK3CA, PIK3R1, AKT1 |  Multiple inputs   |
| 19                | m848                       | AKT1                 |  Feed forward loop |
| 20                | m3760                      | MYC, AKT1            |  Multiple inputs   |
| 21                | m2558                      | PIK3CA, PIK3R1, AKT1 |  Multiple inputs   |
| 22                | m2571                      | PIK3CA, PIK3R1, AKT1 |  Multiple inputs   |
| 23                | m2570                      | PIK3CA, PIK3R1, AKT1 |  Multiple inputs   |
| 24                | m2559                      | PIK3CA, PIK3R1, AKT1 |  Multiple inputs   |
| 25                | m2560                      | PIK3CA, PIK3R1, AKT1 |  Multiple inputs   |
| 26                | m2562                      | PIK3CA, PIK3R1, AKT1 |  Multiple inputs   |
| 27                | m2776                      | PIK3CA, PIK3R1, AKT1 |  Multiple inputs   |
| 28                | m2563                      | PIK3CA, PIK3R1, AKT1 |  Multiple inputs   |
| 29                | m2565                      | PIK3CA, PIK3R1, AKT1 |  Multiple inputs   |
| 30                | m2567                      | PIK3CA, PIK3R1, AKT1 |  Multiple inputs   |
| 31                | m3857                      | PIK3CA, PIK3R1, AKT1 |  Multiple inputs   |
| 32                | m4096                      | RAF1, AKT1           |  Feed forward loop |

---

|    |       |                      |                                                                                     |                 |
|----|-------|----------------------|-------------------------------------------------------------------------------------|-----------------|
| 33 | m3921 | CREB1, AKT1          |  | Multiple inputs |
| 34 | m3859 | PIK3CA, PIK3R1, AKT1 |  | Multiple inputs |
| 35 | m3927 | CREB1, AKT1          |  | Multiple inputs |
| 36 | m3928 | CREB1, AKT1          |  | Multiple inputs |
| 37 | m3316 | CREB1, AKT1          |  | Multiple inputs |
| 38 | m3425 | CREB1, AKT1          |  | Multiple inputs |
| 39 | m3569 | CREB1, AKT1          |  | Multiple inputs |

---

<sup>a</sup> The marketing centrality motifs are ranked based on the sum of rank in each ranked list  $Ns_i$ .

<sup>b</sup> The vertices containing cancer genes are represented in green, and others are represented in black. The two kinds of edges are represented by black (output) and green (activation) edges, respectively.
