# Supplementary material for: Cancer-related marketing centrality motifs acting as pivot units in the human signaling network and mediating cross-talk between biological pathways
Source: Royal Society of Chemistry journal article supplement (doi:10.1039/c3mb70289h), 2013-09-04
Supplement: c3mb70289h_5.pdf [file c3mb70289h_5.pdf]

**Table S4. Cross-talks between biological pathways mediated by marketing centrality motifs.**

| Motif     | Cross-talk type <sup>a</sup> | Pathway cross-talks mediated by motifs                                                                                                                                                                                                                                                                                                                                                                                                                                                                                                                                                                                                                                                                                                                                                                                                                                                                                           |
|-----------|------------------------------|----------------------------------------------------------------------------------------------------------------------------------------------------------------------------------------------------------------------------------------------------------------------------------------------------------------------------------------------------------------------------------------------------------------------------------------------------------------------------------------------------------------------------------------------------------------------------------------------------------------------------------------------------------------------------------------------------------------------------------------------------------------------------------------------------------------------------------------------------------------------------------------------------------------------------------|
| m848      | C                            | hsa04150:mTOR signaling pathway<br>hsa05221:Acute myeloid leukemia<br>hsa04012:ErbB signaling pathway<br>hsa04666:Fc gamma R-mediated phagocytosis<br>hsa04910:Insulin signaling pathway                                                                                                                                                                                                                                                                                                                                                                                                                                                                                                                                                                                                                                                                                                                                         |
|           |                              | hsa04310:Wnt signaling pathway<br>hsa04114:Oocyte meiosis                                                                                                                                                                                                                                                                                                                                                                                                                                                                                                                                                                                                                                                                                                                                                                                                                                                                        |
| m227<br>6 | A                            | hsa05215:Prostate cancer                                                                                                                                                                                                                                                                                                                                                                                                                                                                                                                                                                                                                                                                                                                                                                                                                                                                                                         |
|           | B                            | hsa04916:Melanogenesis<br>hsa05215:Prostate cancer                                                                                                                                                                                                                                                                                                                                                                                                                                                                                                                                                                                                                                                                                                                                                                                                                                                                               |
|           |                              | hsa04630:Jak-STAT signaling pathway<br>hsa04530:Tight junction<br>hsa05222:Small cell lung cancer<br>hsa04920:Adipocytokine signaling pathway<br>hsa04210:Apoptosis<br>hsa05215:Prostate cancer<br>hsa04150:mTOR signaling pathway<br>hsa05213:Endometrial cancer<br>hsa05223:Non-small cell lung cancer<br>hsa05221:Acute myeloid leukemia<br>hsa05214:Glioma<br>hsa05211:Renal cell carcinoma<br>hsa05218:Melanoma<br>hsa05212:Pancreatic cancer<br>hsa04662:B cell receptor signaling pathway<br>hsa05220:Chronic myeloid leukemia<br>hsa04370:VEGF signaling pathway<br>hsa04664:Fc epsilon RI signaling pathway<br>hsa05210:Colorectal cancer<br>hsa04914:Progesterone-mediated oocyte maturation<br>hsa04012:ErbB signaling pathway<br>hsa04666:Fc gamma R-mediated phagocytosis<br>hsa04620:Toll-like receptor signaling pathway<br>hsa04660:T cell receptor signaling pathway<br>hsa04722:Neurotrophin signaling pathway |

|           |   |                                                                                                                                                                                                                                                                                                                                                                                                                                                                                                                                                                                                                                                                                                                                                                                                                                                                                                                                      |                                                                                                                                     |
|-----------|---|--------------------------------------------------------------------------------------------------------------------------------------------------------------------------------------------------------------------------------------------------------------------------------------------------------------------------------------------------------------------------------------------------------------------------------------------------------------------------------------------------------------------------------------------------------------------------------------------------------------------------------------------------------------------------------------------------------------------------------------------------------------------------------------------------------------------------------------------------------------------------------------------------------------------------------------|-------------------------------------------------------------------------------------------------------------------------------------|
|           |   | hsa04910:Insulin signaling pathway<br>hsa04062:Chemokine signaling pathway<br>hsa04510:Focal adhesion<br>hsa04010:MAPK signaling pathway<br>hsa05200:Pathways in cancer                                                                                                                                                                                                                                                                                                                                                                                                                                                                                                                                                                                                                                                                                                                                                              |                                                                                                                                     |
|           |   | hsa04150:mTOR signaling pathway<br>hsa05213:Endometrial cancer<br>hsa05223:Non-small cell lung cancer<br>hsa05221:Acute myeloid leukemia<br>hsa05214:Glioma<br>hsa05211:Renal cell carcinoma<br>hsa05218:Melanoma<br>hsa05212:Pancreatic cancer<br>hsa04662:B cell receptor signaling pathway<br>hsa05220:Chronic myeloid leukemia<br>hsa04370:VEGF signaling pathway<br>hsa04664:Fc epsilon RI signaling pathway<br>hsa05210:Colorectal cancer<br>hsa04914:Progesterone-mediated oocyte maturation<br>hsa04012:ErbB signaling pathway<br>hsa04666:Fc gamma R-mediated phagocytosis<br>hsa04620:Toll-like receptor signaling pathway<br>hsa04660:T cell receptor signaling pathway<br>hsa04722:Neurotrophin signaling pathway<br>hsa04910:Insulin signaling pathway<br>hsa04062:Chemokine signaling pathway<br>hsa04510:Focal adhesion<br>hsa04010:MAPK signaling pathway<br>hsa05200:Pathways in cancer<br>hsa05215:Prostate cancer | hsa04612:Antigen processing and presentation<br>hsa05016:Huntington's disease<br>hsa05215:Prostate cancer<br>hsa04916:Melanogenesis |
| m255<br>4 | B | hsa04150:mTOR signaling pathway<br>hsa05213:Endometrial cancer<br>hsa05223:Non-small cell lung cancer                                                                                                                                                                                                                                                                                                                                                                                                                                                                                                                                                                                                                                                                                                                                                                                                                                | Other <sup>b</sup>                                                                                                                  |

|           |   |                                                                                                                                                                                                                                                                                                                                                                                                                                                                                                                                                                                                                                                                                                                                                                                                                                                                                          |                                                                               |
|-----------|---|------------------------------------------------------------------------------------------------------------------------------------------------------------------------------------------------------------------------------------------------------------------------------------------------------------------------------------------------------------------------------------------------------------------------------------------------------------------------------------------------------------------------------------------------------------------------------------------------------------------------------------------------------------------------------------------------------------------------------------------------------------------------------------------------------------------------------------------------------------------------------------------|-------------------------------------------------------------------------------|
|           |   | hsa05221:Acute myeloid leukemia<br>hsa05214:Glioma<br>hsa05211:Renal cell carcinoma<br>hsa05218:Melanoma<br>hsa05212:Pancreatic cancer<br>hsa04370:VEGF signaling pathway<br>hsa05220:Chronic myeloid leukemia<br>hsa04662:B cell receptor signaling pathway<br>hsa04664:Fc epsilon RI signaling pathway<br>hsa05222:Small cell lung cancer<br>hsa05210:Colorectal cancer<br>hsa04914:Progesterone-mediated oocyte maturation<br>hsa04012:ErbB signaling pathway<br>hsa04210:Apoptosis<br>hsa05215:Prostate cancer<br>hsa04666:Fc gamma R-mediated phagocytosis<br>hsa04620:Toll-like receptor signaling pathway<br>hsa04660:T cell receptor signaling pathway<br>hsa04722:Neurotrophin signaling pathway<br>hsa04910:Insulin signaling pathway<br>hsa04630:Jak-STAT signaling pathway<br>hsa04062:Chemokine signaling pathway<br>hsa04510:Focal adhesion<br>hsa05200:Pathways in cancer |                                                                               |
|           | A | hsa04722:Neurotrophin signaling pathway<br>hsa04910:Insulin signaling pathway                                                                                                                                                                                                                                                                                                                                                                                                                                                                                                                                                                                                                                                                                                                                                                                                            |                                                                               |
| m255<br>5 | B | hsa04150:mTOR signaling pathway<br>hsa05218:Melanoma<br>hsa05212:Pancreatic cancer<br>hsa04370:VEGF signaling pathway<br>hsa05222:Small cell lung cancer<br>hsa04914:Progesterone-mediated oocyte maturation<br>hsa04210:Apoptosis<br>hsa04666:Fc gamma R-mediated phagocytosis<br>hsa04620:Toll-like receptor signaling pathway                                                                                                                                                                                                                                                                                                                                                                                                                                                                                                                                                         | hsa04722:Neurotrophin signaling pathway<br>hsa04910:Insulin signaling pathway |

---

|      |   |                                                  |       |
|------|---|--------------------------------------------------|-------|
|      |   | hsa05213:Endometrial cancer                      |       |
|      |   | hsa05223:Non-small cell lung cancer              |       |
|      |   | hsa05221:Acute myeloid leukemia                  |       |
|      |   | hsa05214:Glioma                                  |       |
|      |   | hsa05211:Renal cell carcinoma                    |       |
|      |   | hsa04662:B cell receptor signaling pathway       |       |
|      |   | hsa05220:Chronic myeloid leukemia                |       |
|      |   | hsa04664:Fc epsilon RI signaling pathway         |       |
|      |   | hsa05210:Colorectal cancer                       |       |
|      |   | hsa04012:ErbB signaling pathway                  |       |
|      |   | hsa05215:Prostate cancer                         |       |
|      |   | hsa04660:T cell receptor signaling pathway       |       |
|      |   | hsa04630:Jak-STAT signaling pathway              |       |
|      |   | hsa04062:Chemokine signaling pathway             |       |
|      |   | hsa04510:Focal adhesion                          |       |
|      |   | hsa05200:Pathways in cancer                      |       |
|      |   | hsa04722:Neurotrophin signaling pathway          |       |
|      |   | hsa04910:Insulin signaling pathway               |       |
|      |   | hsa05213:Endometrial cancer                      |       |
|      |   | hsa04150:mTOR signaling pathway                  |       |
|      |   | hsa05223:Non-small cell lung cancer              |       |
|      |   | hsa05221:Acute myeloid leukemia                  |       |
|      |   | hsa05214:Glioma                                  |       |
|      |   | hsa05211:Renal cell carcinoma                    |       |
|      |   | hsa05218:Melanoma                                |       |
| m255 | B | hsa05212:Pancreatic cancer                       | Other |
| 6    |   | hsa04370:VEGF signaling pathway                  |       |
|      |   | hsa04662:B cell receptor signaling pathway       |       |
|      |   | hsa05220:Chronic myeloid leukemia                |       |
|      |   | hsa04664:Fc epsilon RI signaling pathway         |       |
|      |   | hsa05210:Colorectal cancer                       |       |
|      |   | hsa05222:Small cell lung cancer                  |       |
|      |   | hsa04914:Progesterone-mediated oocyte maturation |       |
|      |   | hsa04210:Apoptosis                               |       |

---

---

|      |   |                                                  |                                     |
|------|---|--------------------------------------------------|-------------------------------------|
|      |   | hsa04012:ErbB signaling pathway                  |                                     |
|      |   | hsa05215:Prostate cancer                         |                                     |
|      |   | hsa04666:Fc gamma R-mediated phagocytosis        |                                     |
|      |   | hsa04620:Toll-like receptor signaling pathway    |                                     |
|      |   | hsa04660:T cell receptor signaling pathway       |                                     |
|      |   | hsa04722:Neurotrophin signaling pathway          |                                     |
|      |   | hsa04910:Insulin signaling pathway               |                                     |
|      |   | hsa04630:Jak-STAT signaling pathway              |                                     |
|      |   | hsa04062:Chemokine signaling pathway             |                                     |
|      |   | hsa04510:Focal adhesion                          |                                     |
|      |   | hsa05200:Pathways in cancer                      |                                     |
|      |   | hsa04150:mTOR signaling pathway                  |                                     |
|      |   | hsa05213:Endometrial cancer                      |                                     |
|      |   | hsa05223:Non-small cell lung cancer              |                                     |
|      |   | hsa05221:Acute myeloid leukemia                  |                                     |
|      |   | hsa05214:Glioma                                  |                                     |
|      |   | hsa05211:Renal cell carcinoma                    |                                     |
|      |   | hsa05218:Melanoma                                |                                     |
|      |   | hsa05212:Pancreatic cancer                       |                                     |
|      |   | hsa04662:B cell receptor signaling pathway       |                                     |
|      |   | hsa05220:Chronic myeloid leukemia                | hsa04350:TGF-beta signaling pathway |
|      |   | hsa04370:VEGF signaling pathway                  | hsa04310:Wnt signaling pathway      |
| m255 |   | hsa04664:Fc epsilon RI signaling pathway         | hsa04730:Long-term depression       |
| 7    | B | hsa05222:Small cell lung cancer                  | hsa04114:Oocyte meiosis             |
|      |   | hsa05210:Colorectal cancer                       | hsa04530:Tight junction             |
|      |   | hsa04914:Progesterone-mediated oocyte maturation |                                     |
|      |   | hsa04012:ErbB signaling pathway                  |                                     |
|      |   | hsa04210:Apoptosis                               |                                     |
|      |   | hsa05215:Prostate cancer                         |                                     |
|      |   | hsa04666:Fc gamma R-mediated phagocytosis        |                                     |
|      |   | hsa04620:Toll-like receptor signaling pathway    |                                     |
|      |   | hsa04660:T cell receptor signaling pathway       |                                     |
|      |   | hsa04722:Neurotrophin signaling pathway          |                                     |
|      |   | hsa04910:Insulin signaling                       |                                     |

---

---

|   |                                      |                                                    |
|---|--------------------------------------|----------------------------------------------------|
|   | pathway                              |                                                    |
|   | hsa04630:Jak-STAT signaling pathway  |                                                    |
|   | hsa04062:Chemokine signaling pathway |                                                    |
|   | hsa04510:Focal adhesion              |                                                    |
|   | hsa05200:Pathways in cancer          |                                                    |
|   |                                      | hsa04150:mTOR signaling pathway                    |
|   |                                      | hsa05213:Endometrial cancer                        |
|   |                                      | hsa05223:Non-small cell lung cancer                |
|   |                                      | hsa05221:Acute myeloid leukemia                    |
|   |                                      | hsa05214:Glioma                                    |
|   |                                      | hsa05211:Renal cell carcinoma                      |
|   |                                      | hsa05218:Melanoma                                  |
|   |                                      | hsa05212:Pancreatic cancer                         |
|   |                                      | hsa04662:B cell receptor signaling pathway         |
|   |                                      | hsa05220:Chronic myeloid leukemia                  |
|   |                                      | hsa04370:VEGF signaling pathway                    |
|   |                                      | hsa04664:Fc epsilon RI signaling pathway           |
|   |                                      | hsa05222:Small cell lung cancer                    |
|   |                                      | hsa05210:Colorectal cancer                         |
|   |                                      | hsa04914:Progesterone-mediated oocyte maturation   |
| B | hsa04530:Tight junction              | hsa04012:ErbB signaling pathway                    |
|   |                                      | hsa04210:Apoptosis                                 |
|   |                                      | hsa05215:Prostate cancer                           |
|   |                                      | hsa04666:Fc gamma R-mediated phagocytosis          |
|   |                                      | hsa04620:Toll-like receptor signaling pathway      |
|   |                                      | hsa04660:T cell receptor signaling pathway         |
|   |                                      | hsa04722:Neurotrophin signaling pathway            |
|   |                                      | hsa04910:Insulin signaling pathway                 |
|   |                                      | hsa04630:Jak-STAT signaling pathway                |
|   |                                      | hsa04062:Chemokine signaling pathway               |
|   |                                      | hsa04510:Focal adhesion                            |
|   |                                      | hsa05200:Pathways in cancer                        |
|   |                                      | hsa04960:Aldosterone-regulated sodium reabsorption |
|   |                                      | hsa04930:Type II diabetes mellitus                 |
|   |                                      | hsa04070:Phosphatidylinositol signaling system     |

---

|           |   |                                                                                                                                                                                                                                                                                                                                                                                                                                                                                                                                                                                                                                                                                                                                                                                                                                                                                                                                                                                                   |
|-----------|---|---------------------------------------------------------------------------------------------------------------------------------------------------------------------------------------------------------------------------------------------------------------------------------------------------------------------------------------------------------------------------------------------------------------------------------------------------------------------------------------------------------------------------------------------------------------------------------------------------------------------------------------------------------------------------------------------------------------------------------------------------------------------------------------------------------------------------------------------------------------------------------------------------------------------------------------------------------------------------------------------------|
|           |   | hsa04670:Leukocyte transendothelial migration<br>hsa04650:Natural killer cell mediated cytotoxicity<br>hsa04810:Regulation of actin cytoskeleton                                                                                                                                                                                                                                                                                                                                                                                                                                                                                                                                                                                                                                                                                                                                                                                                                                                  |
|           |   | hsa05213:Endometrial cancer<br>hsa04150:mTOR signaling pathway<br>hsa05223:Non-small cell lung cancer<br>hsa05221:Acute myeloid leukemia<br>hsa05214:Glioma<br>hsa05211:Renal cell carcinoma<br>hsa05218:Melanoma<br>hsa05212:Pancreatic cancer<br>hsa04662:B cell receptor signaling pathway<br>hsa04370:VEGF signaling pathway<br>hsa05220:Chronic myeloid leukemia<br>hsa04664:Fc epsilon RI signaling pathway<br>hsa05222:Small cell lung cancer<br>hsa05210:Colorectal cancer<br>hsa04914:Progesterone-mediated oocyte maturation<br>hsa04012:ErbB signaling pathway<br>hsa04210:Apoptosis<br>hsa05215:Prostate cancer<br>hsa04666:Fc gamma R-mediated phagocytosis<br>hsa04620:Toll-like receptor signaling pathway<br>hsa04660:T cell receptor signaling pathway<br>hsa04722:Neurotrophin signaling pathway<br>hsa04910:Insulin signaling pathway<br>hsa04630:Jak-STAT signaling pathway<br>hsa04062:Chemokine signaling pathway<br>hsa04510:Focal adhesion<br>hsa05200:Pathways in cancer |
| m255<br>8 | B | hsa00562:Inositol phosphate metabolism<br>hsa04070:Phosphatidylinositol signaling system                                                                                                                                                                                                                                                                                                                                                                                                                                                                                                                                                                                                                                                                                                                                                                                                                                                                                                          |
|           | C | hsa04010:MAPK signaling pathway<br>hsa04530:Tight junction<br>hsa04920:Adipocytokine signaling pathway                                                                                                                                                                                                                                                                                                                                                                                                                                                                                                                                                                                                                                                                                                                                                                                                                                                                                            |

|           |   |                                                                                                                                                                                                                                                                                                                                                                                                                                                                                                                                                                                                                                                                                                                                                                                                                                                                                                                                                                                                   |
|-----------|---|---------------------------------------------------------------------------------------------------------------------------------------------------------------------------------------------------------------------------------------------------------------------------------------------------------------------------------------------------------------------------------------------------------------------------------------------------------------------------------------------------------------------------------------------------------------------------------------------------------------------------------------------------------------------------------------------------------------------------------------------------------------------------------------------------------------------------------------------------------------------------------------------------------------------------------------------------------------------------------------------------|
|           |   | hsa05213:Endometrial cancer<br>hsa04150:mTOR signaling pathway<br>hsa05223:Non-small cell lung cancer<br>hsa05221:Acute myeloid leukemia<br>hsa05214:Glioma<br>hsa05211:Renal cell carcinoma<br>hsa05218:Melanoma<br>hsa05212:Pancreatic cancer<br>hsa04662:B cell receptor signaling pathway<br>hsa04370:VEGF signaling pathway<br>hsa05220:Chronic myeloid leukemia<br>hsa04664:Fc epsilon RI signaling pathway<br>hsa05222:Small cell lung cancer<br>hsa05210:Colorectal cancer<br>hsa04914:Progesterone-mediated oocyte maturation<br>hsa04012:ErbB signaling pathway<br>hsa04210:Apoptosis<br>hsa05215:Prostate cancer<br>hsa04666:Fc gamma R-mediated phagocytosis<br>hsa04620:Toll-like receptor signaling pathway<br>hsa04660:T cell receptor signaling pathway<br>hsa04722:Neurotrophin signaling pathway<br>hsa04910:Insulin signaling pathway<br>hsa04630:Jak-STAT signaling pathway<br>hsa04062:Chemokine signaling pathway<br>hsa04510:Focal adhesion<br>hsa05200:Pathways in cancer |
|           | A | hsa04062:Chemokine signaling pathway                                                                                                                                                                                                                                                                                                                                                                                                                                                                                                                                                                                                                                                                                                                                                                                                                                                                                                                                                              |
| m255<br>9 | B | hsa05213:Endometrial cancer<br>hsa04150:mTOR signaling pathway<br>hsa05223:Non-small cell lung cancer<br>hsa05221:Acute myeloid leukemia<br>hsa05214:Glioma<br>hsa05211:Renal cell carcinoma                                                                                                                                                                                                                                                                                                                                                                                                                                                                                                                                                                                                                                                                                                                                                                                                      |
|           |   | hsa04062:Chemokine signaling pathway<br>hsa04530:Tight junction                                                                                                                                                                                                                                                                                                                                                                                                                                                                                                                                                                                                                                                                                                                                                                                                                                                                                                                                   |



---

hsa05218:Melanoma  
hsa05212:Pancreatic cancer  
hsa04370:VEGF signaling pathway  
hsa04662:B cell receptor signaling pathway  
hsa05220:Chronic myeloid leukemia  
hsa04664:Fc epsilon RI signaling pathway  
hsa05210:Colorectal cancer  
hsa05222:Small cell lung cancer  
hsa04914:Progesterone-mediated oocyte maturation  
hsa04012:ErbB signaling pathway  
hsa04210:Apoptosis  
hsa05215:Prostate cancer  
hsa04666:Fc gamma R-mediated phagocytosis  
hsa04620:Toll-like receptor signaling pathway  
hsa04630:Jak-STAT signaling pathway  
hsa04660:T cell receptor signaling pathway  
hsa04722:Neurotrophin signaling pathway  
hsa04510:Focal adhesion  
hsa05200:Pathways in cancer  
hsa04910:Insulin signaling pathway  
hsa04062:Chemokine signaling pathway

B

hsa04530:Tight junction  
hsa04062:Chemokine signaling pathway

---

hsa05213:Endometrial cancer  
hsa04150:mTOR signaling pathway  
hsa05223:Non-small cell lung cancer  
hsa05221:Acute myeloid leukemia  
hsa05214:Glioma  
hsa05211:Renal cell carcinoma  
hsa05218:Melanoma  
hsa05212:Pancreatic cancer  
hsa04370:VEGF signaling pathway  
hsa04662:B cell receptor signaling pathway  
hsa05220:Chronic myeloid leukemia  
hsa04664:Fc epsilon RI signaling pathway  
hsa05210:Colorectal cancer  
hsa05222:Small cell lung cancer

---

|           |   |                                                                                                                                                                                                                                                                                                                                                                                                                                                                                                                                                                                                                                                                                                                                                                                                                                                                                                                                                                                                                                                                                                                                                          |       |
|-----------|---|----------------------------------------------------------------------------------------------------------------------------------------------------------------------------------------------------------------------------------------------------------------------------------------------------------------------------------------------------------------------------------------------------------------------------------------------------------------------------------------------------------------------------------------------------------------------------------------------------------------------------------------------------------------------------------------------------------------------------------------------------------------------------------------------------------------------------------------------------------------------------------------------------------------------------------------------------------------------------------------------------------------------------------------------------------------------------------------------------------------------------------------------------------|-------|
|           |   | <p>hsa04914:Progesterone-mediated oocyte maturation<br/>                 hsa04012:ErbB signaling pathway<br/>                 hsa04210:Apoptosis<br/>                 hsa05215:Prostate cancer<br/>                 hsa04666:Fc gamma R-mediated phagocytosis<br/>                 hsa04620:Toll-like receptor signaling pathway<br/>                 hsa04630:Jak-STAT signaling pathway<br/>                 hsa04660:T cell receptor signaling pathway<br/>                 hsa04722:Neurotrophin signaling pathway<br/>                 hsa04510:Focal adhesion<br/>                 hsa05200:Pathways in cancer<br/>                 hsa04670:Leukocyte transendothelial migration<br/>                 hsa04810:Regulation of actin cytoskeleton<br/>                 hsa04960:Aldosterone-regulated sodium reabsorption<br/>                 hsa04070:Phosphatidylinositol signaling system<br/>                 hsa04650:Natural killer cell mediated cytotoxicity<br/>                 hsa04910:Insulin signaling pathway<br/>                 hsa04062:Chemokine signaling pathway<br/>                 hsa04930:Type II diabetes mellitus</p> |       |
| m256<br>0 | B | <p>hsa05221:Acute myeloid leukemia<br/>                 hsa05214:Glioma<br/>                 hsa05211:Renal cell carcinoma<br/>                 hsa05218:Melanoma<br/>                 hsa05212:Pancreatic cancer<br/>                 hsa04662:B cell receptor signaling pathway<br/>                 hsa05220:Chronic myeloid leukemia<br/>                 hsa04370:VEGF signaling pathway<br/>                 hsa04664:Fc epsilon RI signaling pathway<br/>                 hsa05210:Colorectal cancer<br/>                 hsa05222:Small cell lung cancer<br/>                 hsa04914:Progesterone-mediated oocyte maturation<br/>                 hsa04210:Apoptosis<br/>                 hsa04012:ErbB signaling pathway<br/>                 hsa04666:Fc gamma</p>                                                                                                                                                                                                                                                                                                                                                                           | Other |

|           |   |                                                                                                                                                                                                                                                                                                                                                                                                                                                                                                                                                                                                                                                                                                                                                                |                                                                                              |
|-----------|---|----------------------------------------------------------------------------------------------------------------------------------------------------------------------------------------------------------------------------------------------------------------------------------------------------------------------------------------------------------------------------------------------------------------------------------------------------------------------------------------------------------------------------------------------------------------------------------------------------------------------------------------------------------------------------------------------------------------------------------------------------------------|----------------------------------------------------------------------------------------------|
|           |   | R-mediated phagocytosis<br>hsa04620:Toll-like receptor<br>signaling pathway<br>hsa04660:T cell receptor<br>signaling pathway<br>hsa04722:Neurotrophin<br>signaling pathway<br>hsa04630:Jak-STAT<br>signaling pathway<br>hsa04062:Chemokine<br>signaling pathway<br>hsa05200:Pathways in cancer<br>hsa04150:mTOR signaling<br>pathway<br>hsa05213:Endometrial<br>cancer<br>hsa05223:Non-small cell<br>lung cancer<br>hsa05215:Prostate cancer<br>hsa04910:Insulin signaling<br>pathway<br>hsa04510:Focal adhesion                                                                                                                                                                                                                                               |                                                                                              |
|           | A | hsa05213:Endometrial cancer<br>hsa04510:Focal adhesion                                                                                                                                                                                                                                                                                                                                                                                                                                                                                                                                                                                                                                                                                                         |                                                                                              |
|           |   | hsa04150:mTOR signaling<br>pathway<br>hsa05223:Non-small cell<br>lung cancer<br>hsa05221:Acute myeloid<br>leukemia<br>hsa05214:Glioma<br>hsa05211:Renal cell<br>carcinoma<br>hsa05218:Melanoma<br>hsa05212:Pancreatic cancer<br>hsa05220:Chronic myeloid<br>leukemia<br>hsa04662:B cell receptor<br>signaling pathway<br>hsa04370:VEGF signaling<br>pathway<br>hsa04664:Fc epsilon RI<br>signaling pathway<br>hsa05222:Small cell lung<br>cancer<br>hsa05210:Colorectal cancer<br>hsa04914:Progesterone-medi<br>ated oocyte maturation<br>hsa04012:ErbB signaling<br>pathway<br>hsa04210:Apoptosis<br>hsa05215:Prostate cancer<br>hsa04666:Fc gamma<br>R-mediated phagocytosis<br>hsa04620:Toll-like receptor<br>signaling pathway<br>hsa04660:T cell receptor | hsa03320:PPAR signaling<br>pathway<br>hsa05213:Endometrial cancer<br>hsa04510:Focal adhesion |
| m256<br>1 | B |                                                                                                                                                                                                                                                                                                                                                                                                                                                                                                                                                                                                                                                                                                                                                                |                                                                                              |

---

|           |   |                                                                                                                                                                                                                                                                                                                                                                                                                                                                                                                                                                                                                                                                                                                                                                                                                                                                                                                                                                                                                              |                                         |
|-----------|---|------------------------------------------------------------------------------------------------------------------------------------------------------------------------------------------------------------------------------------------------------------------------------------------------------------------------------------------------------------------------------------------------------------------------------------------------------------------------------------------------------------------------------------------------------------------------------------------------------------------------------------------------------------------------------------------------------------------------------------------------------------------------------------------------------------------------------------------------------------------------------------------------------------------------------------------------------------------------------------------------------------------------------|-----------------------------------------|
|           |   | signaling pathway<br>hsa04722:Neurotrophin<br>signaling pathway<br>hsa04910:Insulin signaling<br>pathway<br>hsa04630:Jak-STAT<br>signaling pathway<br>hsa04062:Chemokine<br>signaling pathway<br>hsa05200:Pathways in cancer<br>hsa05213:Endometrial<br>cancer<br>hsa04510:Focal adhesion                                                                                                                                                                                                                                                                                                                                                                                                                                                                                                                                                                                                                                                                                                                                    |                                         |
|           |   | hsa04150:mTOR signaling<br>pathway<br>hsa05213:Endometrial<br>cancer<br>hsa05223:Non-small cell<br>lung cancer<br>hsa05221:Acute myeloid<br>leukemia<br>hsa05214:Glioma<br>hsa05211:Renal cell<br>carcinoma<br>hsa05218:Melanoma<br>hsa05212:Pancreatic cancer<br>hsa04662:B cell receptor<br>signaling pathway<br>hsa04370:VEGF signaling<br>pathway<br>hsa05220:Chronic myeloid<br>leukemia<br>hsa04664:Fc epsilon RI<br>signaling pathway<br>hsa05210:Colorectal cancer<br>hsa05222:Small cell lung<br>cancer<br>hsa04914:Progesterone-medi<br>ated oocyte maturation<br>hsa04012:ErbB signaling<br>pathway<br>hsa04210:Apoptosis<br>hsa05215:Prostate cancer<br>hsa04666:Fc gamma<br>R-mediated phagocytosis<br>hsa04620:Toll-like receptor<br>signaling pathway<br>hsa04660:T cell receptor<br>signaling pathway<br>hsa04722:Neurotrophin<br>signaling pathway<br>hsa04910:Insulin signaling<br>pathway<br>hsa04630:Jak-STAT<br>signaling pathway<br>hsa04062:Chemokine<br>signaling pathway<br>hsa04510:Focal adhesion |                                         |
| m256<br>2 | B |                                                                                                                                                                                                                                                                                                                                                                                                                                                                                                                                                                                                                                                                                                                                                                                                                                                                                                                                                                                                                              | hsa00970:Aminoacyl-tRNA<br>biosynthesis |

---

|           |   |                                                  |                                |
|-----------|---|--------------------------------------------------|--------------------------------|
|           |   | hsa05200:Pathways in cancer                      |                                |
|           |   | hsa04012:ErbB signaling pathway                  |                                |
|           |   | hsa04150:mTOR signaling pathway                  |                                |
|           |   | hsa05213:Endometrial cancer                      |                                |
|           |   | hsa05223:Non-small cell lung cancer              |                                |
|           |   | hsa05221:Acute myeloid leukemia                  |                                |
|           |   | hsa05214:Glioma                                  |                                |
|           |   | hsa05211:Renal cell carcinoma                    |                                |
|           |   | hsa05218:Melanoma                                |                                |
|           |   | hsa05212:Pancreatic cancer                       |                                |
|           |   | hsa05220:Chronic myeloid leukemia                |                                |
|           |   | hsa04370:VEGF signaling pathway                  |                                |
|           |   | hsa04662:B cell receptor signaling pathway       |                                |
| m256<br>3 | B | hsa04664:Fc epsilon RI signaling pathway         | Other                          |
|           |   | hsa05210:Colorectal cancer                       |                                |
|           |   | hsa04914:Progesterone-mediated oocyte maturation |                                |
|           |   | hsa04210:Apoptosis                               |                                |
|           |   | hsa05215:Prostate cancer                         |                                |
|           |   | hsa04666:Fc gamma R-mediated phagocytosis        |                                |
|           |   | hsa04620:Toll-like receptor signaling pathway    |                                |
|           |   | hsa04660:T cell receptor signaling pathway       |                                |
|           |   | hsa04722:Neurotrophin signaling pathway          |                                |
|           |   | hsa04910:Insulin signaling pathway               |                                |
|           |   | hsa04630:Jak-STAT signaling pathway              |                                |
|           |   | hsa04062:Chemokine signaling pathway             |                                |
|           |   | hsa05222:Small cell lung cancer                  |                                |
|           |   | hsa05200:Pathways in cancer                      |                                |
|           |   | hsa04510:Focal adhesion                          |                                |
|           |   | hsa04150:mTOR signaling pathway                  |                                |
|           |   | hsa05213:Endometrial cancer                      |                                |
| m256<br>4 | B | hsa05223:Non-small cell lung cancer              | hsa04310:Wnt signaling pathway |
|           |   | hsa05221:Acute myeloid leukemia                  | hsa04114:Oocyte meiosis        |
|           |   | hsa05214:Glioma                                  |                                |
|           |   | hsa05211:Renal cell                              |                                |

---

|           |   |                                                                                                                                                                                                                                                                                                                                                                                                                                                                                                                                                                                                                                                                                                                                                                                                                |       |
|-----------|---|----------------------------------------------------------------------------------------------------------------------------------------------------------------------------------------------------------------------------------------------------------------------------------------------------------------------------------------------------------------------------------------------------------------------------------------------------------------------------------------------------------------------------------------------------------------------------------------------------------------------------------------------------------------------------------------------------------------------------------------------------------------------------------------------------------------|-------|
|           |   | carcinoma<br>hsa05218:Melanoma<br>hsa05212:Pancreatic cancer<br>hsa05220:Chronic myeloid leukemia<br>hsa04370:VEGF signaling pathway<br>hsa04662:B cell receptor signaling pathway<br>hsa04664:Fc epsilon RI signaling pathway<br>hsa05210:Colorectal cancer<br>hsa05222:Small cell lung cancer<br>hsa04914:Progesterone-mediated oocyte maturation<br>hsa04012:ErbB signaling pathway<br>hsa04210:Apoptosis<br>hsa05215:Prostate cancer<br>hsa04666:Fc gamma R-mediated phagocytosis<br>hsa04620:Toll-like receptor signaling pathway<br>hsa04660:T cell receptor signaling pathway<br>hsa04722:Neurotrophin signaling pathway<br>hsa04910:Insulin signaling pathway<br>hsa04630:Jak-STAT signaling pathway<br>hsa04062:Chemokine signaling pathway<br>hsa04510:Focal adhesion<br>hsa05200:Pathways in cancer |       |
|           |   | hsa05213:Endometrial cancer<br>hsa05223:Non-small cell lung cancer<br>hsa05211:Renal cell carcinoma<br>hsa05218:Melanoma<br>hsa05212:Pancreatic cancer<br>hsa04370:VEGF signaling pathway<br>hsa04662:B cell receptor signaling pathway<br>hsa05220:Chronic myeloid leukemia<br>hsa04664:Fc epsilon RI signaling pathway<br>hsa05222:Small cell lung cancer<br>hsa05210:Colorectal cancer<br>hsa04914:Progesterone-mediated oocyte maturation<br>hsa04210:Apoptosis                                                                                                                                                                                                                                                                                                                                            |       |
| m256<br>5 | B |                                                                                                                                                                                                                                                                                                                                                                                                                                                                                                                                                                                                                                                                                                                                                                                                                | Other |

---

---

|  |  |                                                                                                                                                                                                                                                                                                                                                                                                                                                                                                                                                                                                                                                                                                                                                                      |                         |
|--|--|----------------------------------------------------------------------------------------------------------------------------------------------------------------------------------------------------------------------------------------------------------------------------------------------------------------------------------------------------------------------------------------------------------------------------------------------------------------------------------------------------------------------------------------------------------------------------------------------------------------------------------------------------------------------------------------------------------------------------------------------------------------------|-------------------------|
|  |  | hsa04666:Fc gamma<br>R-mediated phagocytosis<br>hsa04620:Toll-like receptor<br>signaling pathway<br>hsa04660:T cell receptor<br>signaling pathway<br>hsa04722:Neurotrophin<br>signaling pathway<br>hsa04630:Jak-STAT<br>signaling pathway<br>hsa04062:Chemokine<br>signaling pathway<br>hsa04510:Focal adhesion<br>hsa05221:Acute myeloid<br>leukemia<br>hsa05214:Glioma<br>hsa04012:ErbB signaling<br>pathway<br>hsa05215:Prostate cancer<br>hsa04910:Insulin signaling<br>pathway<br>hsa05200:Pathways in cancer<br>hsa04150:mTOR signaling<br>pathway                                                                                                                                                                                                             |                         |
|  |  | hsa04150:mTOR signaling<br>pathway<br>hsa05213:Endometrial<br>cancer<br>hsa05223:Non-small cell<br>lung cancer<br>hsa05221:Acute myeloid<br>leukemia<br>hsa05214:Glioma<br>hsa05211:Renal cell<br>carcinoma<br>hsa05218:Melanoma<br>hsa05212:Pancreatic cancer<br>hsa04662:B cell receptor<br>signaling pathway<br>hsa04370:VEGF signaling<br>pathway<br>hsa05220:Chronic myeloid<br>leukemia<br>hsa04664:Fc epsilon RI<br>signaling pathway<br>hsa05222:Small cell lung<br>cancer<br>hsa05210:Colorectal cancer<br>hsa04914:Progesterone-medi<br>ated oocyte maturation<br>hsa04012:ErbB signaling<br>pathway<br>hsa04210:Apoptosis<br>hsa05215:Prostate cancer<br>hsa04666:Fc gamma<br>R-mediated phagocytosis<br>hsa04620:Toll-like receptor<br>signaling pathway | hsa04114:Oocyte meiosis |

---

m256  
6

B

---

|      |   |                                                  |       |
|------|---|--------------------------------------------------|-------|
|      |   | hsa04660:T cell receptor signaling pathway       |       |
|      |   | hsa04722:Neurotrophin signaling pathway          |       |
|      |   | hsa04910:Insulin signaling pathway               |       |
|      |   | hsa04630:Jak-STAT signaling pathway              |       |
|      |   | hsa04062:Chemokine signaling pathway             |       |
|      |   | hsa04510:Focal adhesion                          |       |
|      |   | hsa05200:Pathways in cancer                      |       |
|      |   | hsa05221:Acute myeloid leukemia                  |       |
|      |   | hsa05214:Glioma                                  |       |
|      |   | hsa05211:Renal cell carcinoma                    |       |
|      |   | hsa05218:Melanoma                                |       |
|      |   | hsa05212:Pancreatic cancer                       |       |
|      |   | hsa04370:VEGF signaling pathway                  |       |
|      |   | hsa04662:B cell receptor signaling pathway       |       |
|      |   | hsa05220:Chronic myeloid leukemia                |       |
|      |   | hsa04664:Fc epsilon RI signaling pathway         |       |
|      |   | hsa05222:Small cell lung cancer                  |       |
|      |   | hsa05210:Colorectal cancer                       |       |
|      |   | hsa04914:Progesterone-mediated oocyte maturation |       |
|      |   | hsa04012:ErbB signaling pathway                  |       |
| m256 | B | hsa04210:Apoptosis                               | Other |
| 7    |   | hsa04666:Fc gamma R-mediated phagocytosis        |       |
|      |   | hsa04620:Toll-like receptor signaling pathway    |       |
|      |   | hsa04660:T cell receptor signaling pathway       |       |
|      |   | hsa04722:Neurotrophin signaling pathway          |       |
|      |   | hsa04630:Jak-STAT signaling pathway              |       |
|      |   | hsa04062:Chemokine signaling pathway             |       |
|      |   | hsa05200:Pathways in cancer                      |       |
|      |   | hsa04150:mTOR signaling pathway                  |       |
|      |   | hsa05213:Endometrial cancer                      |       |
|      |   | hsa05223:Non-small cell lung cancer              |       |
|      |   | hsa05215:Prostate cancer                         |       |
|      |   | hsa04910:Insulin signaling pathway               |       |
|      |   | hsa04510:Focal adhesion                          |       |

---



|           |   |                                                                                                                                                                                                                                                                                                                                                                                                                                                                                                                                                                                                                                                                                                                                                                                                                                                                                                                                                                                                   |                                                            |
|-----------|---|---------------------------------------------------------------------------------------------------------------------------------------------------------------------------------------------------------------------------------------------------------------------------------------------------------------------------------------------------------------------------------------------------------------------------------------------------------------------------------------------------------------------------------------------------------------------------------------------------------------------------------------------------------------------------------------------------------------------------------------------------------------------------------------------------------------------------------------------------------------------------------------------------------------------------------------------------------------------------------------------------|------------------------------------------------------------|
| m256<br>8 | B | hsa05213:Endometrial cancer<br>hsa04150:mTOR signaling pathway<br>hsa05223:Non-small cell lung cancer<br>hsa05221:Acute myeloid leukemia<br>hsa05214:Glioma<br>hsa05211:Renal cell carcinoma<br>hsa05218:Melanoma<br>hsa05212:Pancreatic cancer<br>hsa04370:VEGF signaling pathway<br>hsa04662:B cell receptor signaling pathway<br>hsa05220:Chronic myeloid leukemia<br>hsa04664:Fc epsilon RI signaling pathway<br>hsa05222:Small cell lung cancer<br>hsa05210:Colorectal cancer<br>hsa04914:Progesterone-mediated oocyte maturation<br>hsa04012:ErbB signaling pathway<br>hsa04210:Apoptosis<br>hsa05215:Prostate cancer<br>hsa04666:Fc gamma R-mediated phagocytosis<br>hsa04620:Toll-like receptor signaling pathway<br>hsa04660:T cell receptor signaling pathway<br>hsa04722:Neurotrophin signaling pathway<br>hsa04910:Insulin signaling pathway<br>hsa04630:Jak-STAT signaling pathway<br>hsa04062:Chemokine signaling pathway<br>hsa04510:Focal adhesion<br>hsa05200:Pathways in cancer | hsa04110:Cell cycle<br>hsa03450:Non-homologous end-joining |
| m256<br>9 | B | hsa05213:Endometrial cancer<br>hsa04150:mTOR signaling pathway<br>hsa05223:Non-small cell lung cancer<br>hsa05221:Acute myeloid leukemia<br>hsa05214:Glioma<br>hsa05211:Renal cell carcinoma<br>hsa05218:Melanoma                                                                                                                                                                                                                                                                                                                                                                                                                                                                                                                                                                                                                                                                                                                                                                                 | Other                                                      |

---

|      |   |                                                  |       |
|------|---|--------------------------------------------------|-------|
|      |   | hsa05212:Pancreatic cancer                       |       |
|      |   | hsa05220:Chronic myeloid leukemia                |       |
|      |   | hsa04662:B cell receptor signaling pathway       |       |
|      |   | hsa04370:VEGF signaling pathway                  |       |
|      |   | hsa04664:Fc epsilon RI signaling pathway         |       |
|      |   | hsa05210:Colorectal cancer                       |       |
|      |   | hsa05222:Small cell lung cancer                  |       |
|      |   | hsa04914:Progesterone-mediated oocyte maturation |       |
|      |   | hsa04012:ErbB signaling pathway                  |       |
|      |   | hsa04210:Apoptosis                               |       |
|      |   | hsa05215:Prostate cancer                         |       |
|      |   | hsa04666:Fc gamma R-mediated phagocytosis        |       |
|      |   | hsa04620:Toll-like receptor signaling pathway    |       |
|      |   | hsa04660:T cell receptor signaling pathway       |       |
|      |   | hsa04722:Neurotrophin signaling pathway          |       |
|      |   | hsa04910:Insulin signaling pathway               |       |
|      |   | hsa04630:Jak-STAT signaling pathway              |       |
|      |   | hsa04062:Chemokine signaling pathway             |       |
|      |   | hsa04510:Focal adhesion                          |       |
|      |   | hsa05200:Pathways in cancer                      |       |
|      |   | hsa05213:Endometrial cancer                      |       |
|      |   | hsa04150:mTOR signaling pathway                  |       |
|      |   | hsa05223:Non-small cell lung cancer              |       |
|      |   | hsa05221:Acute myeloid leukemia                  |       |
|      |   | hsa05214:Glioma                                  |       |
|      |   | hsa05211:Renal cell carcinoma                    |       |
| m257 | B | hsa05218:Melanoma                                | Other |
| 0    |   | hsa05212:Pancreatic cancer                       |       |
|      |   | hsa04370:VEGF signaling pathway                  |       |
|      |   | hsa04662:B cell receptor signaling pathway       |       |
|      |   | hsa05220:Chronic myeloid leukemia                |       |
|      |   | hsa04664:Fc epsilon RI signaling pathway         |       |
|      |   | hsa05222:Small cell lung cancer                  |       |
|      |   | hsa05210:Colorectal cancer                       |       |

---

---

|      |   |                                                  |       |
|------|---|--------------------------------------------------|-------|
|      |   | hsa04914:Progesterone-mediated oocyte maturation |       |
|      |   | hsa04012:ErbB signaling pathway                  |       |
|      |   | hsa04210:Apoptosis                               |       |
|      |   | hsa05215:Prostate cancer                         |       |
|      |   | hsa04666:Fc gamma R-mediated phagocytosis        |       |
|      |   | hsa04620:Toll-like receptor signaling pathway    |       |
|      |   | hsa04660:T cell receptor signaling pathway       |       |
|      |   | hsa04722:Neurotrophin signaling pathway          |       |
|      |   | hsa04910:Insulin signaling pathway               |       |
|      |   | hsa04630:Jak-STAT signaling pathway              |       |
|      |   | hsa04062:Chemokine signaling pathway             |       |
|      |   | hsa04510:Focal adhesion                          |       |
|      |   | hsa05200:Pathways in cancer                      |       |
|      |   | hsa04150:mTOR signaling pathway                  |       |
|      |   | hsa05213:Endometrial cancer                      |       |
|      |   | hsa05223:Non-small cell lung cancer              |       |
|      |   | hsa05221:Acute myeloid leukemia                  |       |
|      |   | hsa05214:Glioma                                  |       |
|      |   | hsa05211:Renal cell carcinoma                    |       |
|      |   | hsa05218:Melanoma                                |       |
|      |   | hsa05212:Pancreatic cancer                       |       |
|      |   | hsa04662:B cell receptor signaling pathway       |       |
|      |   | hsa04370:VEGF signaling pathway                  |       |
| m257 | B | hsa05220:Chronic myeloid leukemia                | Other |
| 1    |   | hsa04664:Fc epsilon RI signaling pathway         |       |
|      |   | hsa05222:Small cell lung cancer                  |       |
|      |   | hsa05210:Colorectal cancer                       |       |
|      |   | hsa04914:Progesterone-mediated oocyte maturation |       |
|      |   | hsa04210:Apoptosis                               |       |
|      |   | hsa04012:ErbB signaling pathway                  |       |
|      |   | hsa05215:Prostate cancer                         |       |
|      |   | hsa04666:Fc gamma R-mediated phagocytosis        |       |
|      |   | hsa04620:Toll-like receptor signaling pathway    |       |
|      |   | hsa04660:T cell receptor signaling pathway       |       |

---

|           |   |                                                                                                                                                                                                                                                                                                                                                                                                                                                                                                                |       |
|-----------|---|----------------------------------------------------------------------------------------------------------------------------------------------------------------------------------------------------------------------------------------------------------------------------------------------------------------------------------------------------------------------------------------------------------------------------------------------------------------------------------------------------------------|-------|
|           |   | hsa04722:Neurotrophin signaling pathway<br>hsa04910:Insulin signaling pathway<br>hsa04630:Jak-STAT signaling pathway<br>hsa04062:Chemokine signaling pathway<br>hsa04510:Focal adhesion<br>hsa05200:Pathways in cancer                                                                                                                                                                                                                                                                                         |       |
|           |   | hsa05221:Acute myeloid leukemia<br>hsa05214:Glioma<br>hsa05211:Renal cell carcinoma<br>hsa05218:Melanoma<br>hsa05212:Pancreatic cancer<br>hsa05220:Chronic myeloid leukemia<br>hsa04370:VEGF signaling pathway<br>hsa04662:B cell receptor signaling pathway<br>hsa04664:Fc epsilon RI signaling pathway<br>hsa05222:Small cell lung cancer<br>hsa05210:Colorectal cancer<br>hsa04012:ErbB signaling pathway<br>hsa04210:Apoptosis<br>hsa04666:Fc gamma R-mediated phagocytosis                                |       |
| m257<br>2 | B | hsa04620:Toll-like receptor signaling pathway<br>hsa04660:T cell receptor signaling pathway<br>hsa04722:Neurotrophin signaling pathway<br>hsa04630:Jak-STAT signaling pathway<br>hsa04062:Chemokine signaling pathway<br>hsa05200:Pathways in cancer<br>hsa04914:Progesterone-mediated oocyte maturation<br>hsa05213:Endometrial cancer<br>hsa05223:Non-small cell lung cancer<br>hsa04510:Focal adhesion<br>hsa04150:mTOR signaling pathway<br>hsa05215:Prostate cancer<br>hsa04910:Insulin signaling pathway | Other |
| m257      | A | hsa05211:Renal cell carcinoma                                                                                                                                                                                                                                                                                                                                                                                                                                                                                  |       |

3

---

|   |                                                    |
|---|----------------------------------------------------|
|   | hsa05212:Pancreatic cancer                         |
|   | hsa04662:B cell receptor signaling pathway         |
|   | hsa04370:VEGF signaling pathway                    |
|   | hsa04664:Fc epsilon RI signaling pathway           |
|   | hsa05210:Colorectal cancer                         |
|   | hsa04666:Fc gamma R-mediated phagocytosis          |
|   | hsa04620:Toll-like receptor signaling pathway      |
|   | hsa04722:Neurotrophin signaling pathway            |
|   | hsa04062:Chemokine signaling pathway               |
|   | hsa04510:Focal adhesion                            |
|   | hsa05200:Pathways in cancer                        |
|   | hsa04150:mTOR signaling pathway                    |
|   | hsa05213:Endometrial cancer                        |
|   | hsa05223:Non-small cell lung cancer                |
|   | hsa05221:Acute myeloid leukemia                    |
|   | hsa05214:Glioma                                    |
|   | hsa05218:Melanoma                                  |
|   | hsa05220:Chronic myeloid leukemia                  |
|   | hsa05222:Small cell lung cancer                    |
|   | hsa04914:Progesterone-mediated oocyte maturation   |
|   | hsa04210:Apoptosis                                 |
|   | hsa04012:ErbB signaling pathway                    |
|   | hsa05215:Prostate cancer                           |
|   | hsa04660:T cell receptor signaling pathway         |
|   | hsa04910:Insulin signaling pathway                 |
| B | hsa04630:Jak-STAT signaling pathway                |
|   | hsa05211:Renal cell carcinoma                      |
|   | hsa05212:Pancreatic cancer                         |
|   | hsa04662:B cell receptor signaling pathway         |
|   | hsa04370:VEGF signaling pathway                    |
|   | hsa04664:Fc epsilon RI signaling pathway           |
|   | hsa05210:Colorectal cancer                         |
|   | hsa04666:Fc gamma R-mediated phagocytosis          |
|   | hsa04620:Toll-like receptor signaling pathway      |
|   | hsa04722:Neurotrophin signaling pathway            |
|   | hsa04062:Chemokine signaling pathway               |
|   | hsa04510:Focal adhesion                            |
|   | hsa05200:Pathways in cancer                        |
|   | hsa05210:Colorectal cancer                         |
|   | hsa04666:Fc gamma R-mediated phagocytosis          |
|   | hsa04620:Toll-like receptor signaling pathway      |
|   | hsa04722:Neurotrophin signaling pathway            |
|   | hsa04062:Chemokine signaling pathway               |
|   | hsa04510:Focal adhesion                            |
|   | hsa05200:Pathways in cancer                        |
|   | hsa04960:Aldosterone-regulated sodium reabsorption |

---

|   |  |                                                    |
|---|--|----------------------------------------------------|
|   |  | hsa04930:Type II diabetes mellitus                 |
|   |  | hsa04070:Phosphatidylinositol signaling system     |
|   |  | hsa04670:Leukocyte transendothelial migration      |
|   |  | hsa04650:Natural killer cell mediated cytotoxicity |
|   |  | hsa04810:Regulation of actin cytoskeleton          |
|   |  | hsa04150:mTOR signaling pathway                    |
|   |  | hsa05213:Endometrial cancer                        |
|   |  | hsa05223:Non-small cell lung cancer                |
|   |  | hsa05221:Acute myeloid leukemia                    |
|   |  | hsa05214:Glioma                                    |
|   |  | hsa05218:Melanoma                                  |
|   |  | hsa05220:Chronic myeloid leukemia                  |
|   |  | hsa05222:Small cell lung cancer                    |
|   |  | hsa04914:Progesterone-mediated oocyte maturation   |
|   |  | hsa04210:Apoptosis                                 |
|   |  | hsa04012:ErbB signaling pathway                    |
|   |  | hsa05215:Prostate cancer                           |
|   |  | hsa04660:T cell receptor signaling pathway         |
| B |  | hsa04910:Insulin signaling pathway                 |
|   |  | hsa04630:Jak-STAT signaling pathway                |
|   |  | hsa05211:Renal cell carcinoma                      |
|   |  | hsa05212:Pancreatic cancer                         |
|   |  | hsa04662:B cell receptor signaling pathway         |
|   |  | hsa04370:VEGF signaling pathway                    |
|   |  | hsa04664:Fc epsilon RI signaling pathway           |
|   |  | hsa05210:Colorectal cancer                         |
|   |  | hsa04666:Fc gamma R-mediated phagocytosis          |
|   |  | hsa04620:Toll-like receptor signaling pathway      |
|   |  | hsa04722:Neurotrophin signaling pathway            |
|   |  | hsa04062:Chemokine signaling pathway               |
|   |  | hsa04510:Focal adhesion                            |
|   |  | hsa05200:Pathways in cancer                        |
|   |  | hsa04670:Leukocyte transendothelial migration      |
|   |  | hsa04650:Natural killer cell mediated cytotoxicity |
|   |  | hsa04810:Regulation of actin cytoskeleton          |
| C |  | hsa04670:Leukocyte                                 |
|   |  | hsa04920:Adipocytokine                             |

|           |                                                                                                                                                                                                                                                                                                                                                                                                                                                                                                                                                                                                                                  |                                                                                                                                                                                                                                                                                                                                                                                                                                                                                                                                                                                                                                                                                                                                                                                                                                                                                                                                                                                                                                                                                                                                                |
|-----------|----------------------------------------------------------------------------------------------------------------------------------------------------------------------------------------------------------------------------------------------------------------------------------------------------------------------------------------------------------------------------------------------------------------------------------------------------------------------------------------------------------------------------------------------------------------------------------------------------------------------------------|------------------------------------------------------------------------------------------------------------------------------------------------------------------------------------------------------------------------------------------------------------------------------------------------------------------------------------------------------------------------------------------------------------------------------------------------------------------------------------------------------------------------------------------------------------------------------------------------------------------------------------------------------------------------------------------------------------------------------------------------------------------------------------------------------------------------------------------------------------------------------------------------------------------------------------------------------------------------------------------------------------------------------------------------------------------------------------------------------------------------------------------------|
|           | transendothelial migration<br>hsa04650:Natural killer cell<br>mediated cytotoxicity<br>hsa04810:Regulation of actin<br>cytoskeleton<br>hsa05211:Renal cell<br>carcinoma<br>hsa05212:Pancreatic cancer<br>hsa04662:B cell receptor<br>signaling pathway<br>hsa04370:VEGF signaling<br>pathway<br>hsa04664:Fc epsilon RI<br>signaling pathway<br>hsa05210:Colorectal cancer<br>hsa04666:Fc gamma<br>R-mediated phagocytosis<br>hsa04620:Toll-like receptor<br>signaling pathway<br>hsa04722:Neurotrophin<br>signaling pathway<br>hsa04062:Chemokine<br>signaling pathway<br>hsa04510:Focal adhesion<br>hsa05200:Pathways in cancer | signaling pathway<br>hsa04530:Tight junction<br>hsa04010:MAPK signaling<br>pathway<br>hsa04150:mTOR signaling<br>pathway<br>hsa05213:Endometrial cancer<br>hsa05223:Non-small cell lung<br>cancer<br>hsa05221:Acute myeloid<br>leukemia<br>hsa05214:Glioma<br>hsa05218:Melanoma<br>hsa05220:Chronic myeloid<br>leukemia<br>hsa05222:Small cell lung<br>cancer<br>hsa04914:Progesterone-mediat<br>ed oocyte maturation<br>hsa04210:Apoptosis<br>hsa04012:ErbB signaling<br>pathway<br>hsa05215:Prostate cancer<br>hsa04660:T cell receptor<br>signaling pathway<br>hsa04910:Insulin signaling<br>pathway<br>hsa04630:Jak-STAT signaling<br>pathway<br>hsa05211:Renal cell<br>carcinoma<br>hsa05212:Pancreatic cancer<br>hsa04662:B cell receptor<br>signaling pathway<br>hsa04370:VEGF signaling<br>pathway<br>hsa04664:Fc epsilon RI<br>signaling pathway<br>hsa05210:Colorectal cancer<br>hsa04666:Fc gamma<br>R-mediated phagocytosis<br>hsa04620:Toll-like receptor<br>signaling pathway<br>hsa04722:Neurotrophin<br>signaling pathway<br>hsa04062:Chemokine<br>signaling pathway<br>hsa04510:Focal adhesion<br>hsa05200:Pathways in cancer |
|           | hsa05211:Renal cell carcinoma<br>hsa05212:Pancreatic cancer<br>hsa04662:B cell receptor signaling pathway<br>hsa04370:VEGF signaling pathway<br>hsa04664:Fc epsilon RI signaling pathway<br>hsa05210:Colorectal cancer<br>hsa04666:Fc gamma R-mediated phagocytosis<br>hsa04620:Toll-like receptor signaling pathway<br>hsa04722:Neurotrophin signaling pathway                                                                                                                                                                                                                                                                  |                                                                                                                                                                                                                                                                                                                                                                                                                                                                                                                                                                                                                                                                                                                                                                                                                                                                                                                                                                                                                                                                                                                                                |
| m277<br>6 | A                                                                                                                                                                                                                                                                                                                                                                                                                                                                                                                                                                                                                                |                                                                                                                                                                                                                                                                                                                                                                                                                                                                                                                                                                                                                                                                                                                                                                                                                                                                                                                                                                                                                                                                                                                                                |

---

|   | hsa04062:Chemokine signaling pathway<br>hsa04510:Focal adhesion<br>hsa05200:Pathways in cancer                                                                                                                                                                                                                                                                                                                                                                                                                                                                                                                                                                                                                                                                                                                                                                                                                                                                                                    |
|---|---------------------------------------------------------------------------------------------------------------------------------------------------------------------------------------------------------------------------------------------------------------------------------------------------------------------------------------------------------------------------------------------------------------------------------------------------------------------------------------------------------------------------------------------------------------------------------------------------------------------------------------------------------------------------------------------------------------------------------------------------------------------------------------------------------------------------------------------------------------------------------------------------------------------------------------------------------------------------------------------------|
|   | hsa04150:mTOR signaling pathway<br>hsa05213:Endometrial cancer<br>hsa05223:Non-small cell lung cancer<br>hsa05221:Acute myeloid leukemia<br>hsa05214:Glioma<br>hsa05218:Melanoma<br>hsa05220:Chronic myeloid leukemia<br>hsa05222:Small cell lung cancer<br>hsa04914:Progesterone-mediated oocyte maturation<br>hsa04210:Apoptosis<br>hsa04012:ErbB signaling pathway<br>hsa05215:Prostate cancer<br>hsa04660:T cell receptor signaling pathway<br>hsa04910:Insulin signaling pathway<br>hsa04630:Jak-STAT signaling pathway<br>hsa05211:Renal cell carcinoma<br>hsa05212:Pancreatic cancer<br>hsa04662:B cell receptor signaling pathway<br>hsa04370:VEGF signaling pathway<br>hsa04664:Fc epsilon RI signaling pathway<br>hsa05210:Colorectal cancer<br>hsa04666:Fc gamma R-mediated phagocytosis<br>hsa04620:Toll-like receptor signaling pathway<br>hsa04722:Neurotrophin signaling pathway<br>hsa04062:Chemokine signaling pathway<br>hsa04510:Focal adhesion<br>hsa05200:Pathways in cancer |
| B | hsa04010:MAPK signaling pathway<br>hsa05211:Renal cell carcinoma<br>hsa05212:Pancreatic cancer<br>hsa04662:B cell receptor signaling pathway<br>hsa04370:VEGF signaling pathway<br>hsa04664:Fc epsilon RI signaling pathway<br>hsa05210:Colorectal cancer<br>hsa04666:Fc gamma R-mediated phagocytosis<br>hsa04620:Toll-like receptor signaling pathway<br>hsa04722:Neurotrophin signaling pathway<br>hsa04062:Chemokine signaling pathway<br>hsa04510:Focal adhesion<br>hsa05200:Pathways in cancer<br>hsa04960:Aldosterone-regulated sodium reabsorption<br>hsa04930:Type II diabetes mellitus<br>hsa04070:Phosphatidylinositol signaling system<br>hsa04670:Leukocyte transendothelial migration<br>hsa04650:Natural killer cell mediated cytotoxicity                                                                                                                                                                                                                                         |

---



|   |  |                                                    |
|---|--|----------------------------------------------------|
|   |  | hsa04810:Regulation of actin cytoskeleton          |
|   |  | hsa04150:mTOR signaling pathway                    |
|   |  | hsa05213:Endometrial cancer                        |
|   |  | hsa05223:Non-small cell lung cancer                |
|   |  | hsa05221:Acute myeloid leukemia                    |
|   |  | hsa05214:Glioma                                    |
|   |  | hsa05218:Melanoma                                  |
|   |  | hsa05220:Chronic myeloid leukemia                  |
|   |  | hsa05222:Small cell lung cancer                    |
|   |  | hsa04914:Progesterone-mediated oocyte maturation   |
|   |  | hsa04210:Apoptosis                                 |
|   |  | hsa04012:ErbB signaling pathway                    |
|   |  | hsa05215:Prostate cancer                           |
|   |  | hsa04660:T cell receptor signaling pathway         |
| B |  | hsa04910:Insulin signaling pathway                 |
|   |  | hsa04630:Jak-STAT signaling pathway                |
|   |  | hsa05211:Renal cell carcinoma                      |
|   |  | hsa05212:Pancreatic cancer                         |
|   |  | hsa04662:B cell receptor signaling pathway         |
|   |  | hsa04370:VEGF signaling pathway                    |
|   |  | hsa04664:Fc epsilon RI signaling pathway           |
|   |  | hsa05210:Colorectal cancer                         |
|   |  | hsa04666:Fc gamma R-mediated phagocytosis          |
|   |  | hsa04620:Toll-like receptor signaling pathway      |
|   |  | hsa04722:Neurotrophin signaling pathway            |
|   |  | hsa04062:Chemokine signaling pathway               |
|   |  | hsa04510:Focal adhesion                            |
|   |  | hsa05200:Pathways in cancer                        |
|   |  | hsa04670:Leukocyte transendothelial migration      |
|   |  | hsa04650:Natural killer cell mediated cytotoxicity |
| C |  | hsa04810:Regulation of actin cytoskeleton          |
|   |  | hsa05211:Renal cell carcinoma                      |
|   |  | hsa05212:Pancreatic cancer                         |
|   |  | hsa04920:Adipocytokine signaling pathway           |
|   |  | hsa04530:Tight junction                            |
|   |  | hsa04010:MAPK signaling pathway                    |
|   |  | hsa04150:mTOR signaling pathway                    |
|   |  | hsa05213:Endometrial cancer                        |
|   |  | hsa05223:Non-small cell lung                       |

|           |   |                                                                                                                                                                                                                                                                                                                                                                                                    |                                                                                                                                                                                                                                                                                                                                                                                                                                                                                                                                                                                                                                                                                                                                                                                                                                                                                                    |
|-----------|---|----------------------------------------------------------------------------------------------------------------------------------------------------------------------------------------------------------------------------------------------------------------------------------------------------------------------------------------------------------------------------------------------------|----------------------------------------------------------------------------------------------------------------------------------------------------------------------------------------------------------------------------------------------------------------------------------------------------------------------------------------------------------------------------------------------------------------------------------------------------------------------------------------------------------------------------------------------------------------------------------------------------------------------------------------------------------------------------------------------------------------------------------------------------------------------------------------------------------------------------------------------------------------------------------------------------|
|           |   | hsa04662:B cell receptor signaling pathway<br>hsa04370:VEGF signaling pathway<br>hsa04664:Fc epsilon RI signaling pathway<br>hsa05210:Colorectal cancer<br>hsa04666:Fc gamma R-mediated phagocytosis<br>hsa04620:Toll-like receptor signaling pathway<br>hsa04722:Neurotrophin signaling pathway<br>hsa04062:Chemokine signaling pathway<br>hsa04510:Focal adhesion<br>hsa05200:Pathways in cancer | cancer<br>hsa05221:Acute myeloid leukemia<br>hsa05214:Glioma<br>hsa05218:Melanoma<br>hsa05220:Chronic myeloid leukemia<br>hsa05222:Small cell lung cancer<br>hsa04914:Progesterone-mediated oocyte maturation<br>hsa04210:Apoptosis<br>hsa04012:ErbB signaling pathway<br>hsa05215:Prostate cancer<br>hsa04660:T cell receptor signaling pathway<br>hsa04910:Insulin signaling pathway<br>hsa04630:Jak-STAT signaling pathway<br>hsa05211:Renal cell carcinoma<br>hsa05212:Pancreatic cancer<br>hsa04662:B cell receptor signaling pathway<br>hsa04370:VEGF signaling pathway<br>hsa04664:Fc epsilon RI signaling pathway<br>hsa05210:Colorectal cancer<br>hsa04666:Fc gamma R-mediated phagocytosis<br>hsa04620:Toll-like receptor signaling pathway<br>hsa04722:Neurotrophin signaling pathway<br>hsa04062:Chemokine signaling pathway<br>hsa04510:Focal adhesion<br>hsa05200:Pathways in cancer |
|           |   |                                                                                                                                                                                                                                                                                                                                                                                                    | hsa04120:Ubiquitin mediated proteolysis<br>hsa04912:GnRH signaling pathway<br>hsa04622:RIG-I-like receptor signaling pathway<br>hsa04722:Neurotrophin signaling pathway<br>hsa04010:MAPK signaling pathway                                                                                                                                                                                                                                                                                                                                                                                                                                                                                                                                                                                                                                                                                         |
| m329<br>6 | B | hsa05215:Prostate cancer                                                                                                                                                                                                                                                                                                                                                                           | hsa04916:Melanogenesis<br>hsa05016:Huntington's disease<br>hsa04612:Antigen processing and presentation<br>hsa05215:Prostate cancer                                                                                                                                                                                                                                                                                                                                                                                                                                                                                                                                                                                                                                                                                                                                                                |
|           | C | hsa04722:Neurotrophin signaling pathway<br>hsa04010:MAPK signaling pathway                                                                                                                                                                                                                                                                                                                         |                                                                                                                                                                                                                                                                                                                                                                                                                                                                                                                                                                                                                                                                                                                                                                                                                                                                                                    |
| m331      | B | hsa05215:Prostate cancer                                                                                                                                                                                                                                                                                                                                                                           | hsa04370:VEGF signaling                                                                                                                                                                                                                                                                                                                                                                                                                                                                                                                                                                                                                                                                                                                                                                                                                                                                            |

|           |   |                                                                                                                                                                                                                      |                                                                                                                                                                                                                                                                                                                                                                                                                                                                                                                                                                                                                                                                                                                                                            |
|-----------|---|----------------------------------------------------------------------------------------------------------------------------------------------------------------------------------------------------------------------|------------------------------------------------------------------------------------------------------------------------------------------------------------------------------------------------------------------------------------------------------------------------------------------------------------------------------------------------------------------------------------------------------------------------------------------------------------------------------------------------------------------------------------------------------------------------------------------------------------------------------------------------------------------------------------------------------------------------------------------------------------|
| 6         |   |                                                                                                                                                                                                                      | pathway<br>hsa04722:Neurotrophin signaling pathway<br>hsa04010:MAPK signaling pathway                                                                                                                                                                                                                                                                                                                                                                                                                                                                                                                                                                                                                                                                      |
|           | C | hsa04370:VEGF signaling pathway<br>hsa04722:Neurotrophin signaling pathway<br>hsa04010:MAPK signaling pathway                                                                                                        | hsa04612:Antigen processing and presentation<br>hsa04916:Melanogenesis<br>hsa05016:Huntington's disease<br>hsa05215:Prostate cancer                                                                                                                                                                                                                                                                                                                                                                                                                                                                                                                                                                                                                        |
| m342<br>5 | B | hsa05215:Prostate cancer                                                                                                                                                                                             | Other                                                                                                                                                                                                                                                                                                                                                                                                                                                                                                                                                                                                                                                                                                                                                      |
| m356<br>9 | B | hsa05215:Prostate cancer                                                                                                                                                                                             | Other                                                                                                                                                                                                                                                                                                                                                                                                                                                                                                                                                                                                                                                                                                                                                      |
|           | A | hsa05210:Colorectal cancer<br>hsa04722:Neurotrophin signaling pathway<br>hsa04510:Focal adhesion<br>hsa05200:Pathways in cancer                                                                                      | hsa04930:Type II diabetes mellitus<br>hsa04621:NOD-like receptor signaling pathway<br>hsa04310:Wnt signaling pathway<br>hsa05120:Epithelial cell signaling in Helicobacter pylori infection<br>hsa04622:RIG-I-like receptor signaling pathway<br>hsa04912:GnRH signaling pathway<br>hsa04920:Adipocytokine signaling pathway<br>hsa05212:Pancreatic cancer<br>hsa04664:Fc epsilon RI signaling pathway<br>hsa04914:Progesterone-mediated oocyte maturation<br>hsa04012:ErbB signaling pathway<br>hsa04620:Toll-like receptor signaling pathway<br>hsa04910:Insulin signaling pathway<br>hsa04010:MAPK signaling pathway<br>hsa05210:Colorectal cancer<br>hsa04722:Neurotrophin signaling pathway<br>hsa04510:Focal adhesion<br>hsa05200:Pathways in cancer |
| m374<br>8 | B | hsa05222:Small cell lung cancer<br>hsa04210:Apoptosis<br>hsa05215:Prostate cancer<br>hsa05210:Colorectal cancer<br>hsa04722:Neurotrophin signaling pathway<br>hsa04510:Focal adhesion<br>hsa05200:Pathways in cancer | hsa04920:Adipocytokine signaling pathway<br>hsa05212:Pancreatic cancer<br>hsa04664:Fc epsilon RI signaling pathway<br>hsa04210:Apoptosis                                                                                                                                                                                                                                                                                                                                                                                                                                                                                                                                                                                                                   |
|           | C | hsa04920:Adipocytokine signaling pathway<br>hsa05212:Pancreatic cancer<br>hsa04664:Fc epsilon RI signaling pathway                                                                                                   | hsa05014:Amyotrophic lateral sclerosis (ALS)<br>hsa05222:Small cell lung cancer<br>hsa04210:Apoptosis                                                                                                                                                                                                                                                                                                                                                                                                                                                                                                                                                                                                                                                      |

|       |                                                                                                                                                                                                                                                                                                                                                  |                                                                                                                                                                                                                                                                                                                                                                                                                                                                                                                                                                                                                           |
|-------|--------------------------------------------------------------------------------------------------------------------------------------------------------------------------------------------------------------------------------------------------------------------------------------------------------------------------------------------------|---------------------------------------------------------------------------------------------------------------------------------------------------------------------------------------------------------------------------------------------------------------------------------------------------------------------------------------------------------------------------------------------------------------------------------------------------------------------------------------------------------------------------------------------------------------------------------------------------------------------------|
|       | hsa04914:Progesterone-mediated oocyte maturation<br>hsa04012:ErbB signaling pathway<br>hsa04620:Toll-like receptor signaling pathway<br>hsa04910:Insulin signaling pathway<br>hsa04010:MAPK signaling pathway<br>hsa05210:Colorectal cancer<br>hsa04722:Neurotrophin signaling pathway<br>hsa04510:Focal adhesion<br>hsa05200:Pathways in cancer | hsa05215:Prostate cancer<br>hsa05210:Colorectal cancer<br>hsa04722:Neurotrophin signaling pathway<br>hsa04510:Focal adhesion<br>hsa05200:Pathways in cancer                                                                                                                                                                                                                                                                                                                                                                                                                                                               |
|       | A                                                                                                                                                                                                                                                                                                                                                | hsa04010:MAPK signaling pathway                                                                                                                                                                                                                                                                                                                                                                                                                                                                                                                                                                                           |
|       |                                                                                                                                                                                                                                                                                                                                                  | hsa04670:Leukocyte transendothelial migration<br>hsa05120:Epithelial cell signaling in Helicobacter pylori infection<br>hsa04912:GnRH signaling pathway<br>hsa04622:RIG-I-like receptor signaling pathway<br>hsa04621:NOD-like receptor signaling pathway<br>hsa05014:Amyotrophic lateral sclerosis (ALS)<br>hsa04370:VEGF signaling pathway<br>hsa04664:Fc epsilon RI signaling pathway<br>hsa04914:Progesterone-mediated oocyte maturation<br>hsa04620:Toll-like receptor signaling pathway<br>hsa04660:T cell receptor signaling pathway<br>hsa04722:Neurotrophin signaling pathway<br>hsa04010:MAPK signaling pathway |
|       | B                                                                                                                                                                                                                                                                                                                                                | hsa05213:Endometrial cancer<br>hsa05221:Acute myeloid leukemia<br>hsa05220:Chronic myeloid leukemia<br>hsa05210:Colorectal cancer<br>hsa05222:Small cell lung cancer<br>hsa04012:ErbB signaling pathway<br>hsa04630:Jak-STAT signaling pathway<br>hsa05200:Pathways in cancer<br>hsa04010:MAPK signaling pathway                                                                                                                                                                                                                                                                                                          |
| m3760 |                                                                                                                                                                                                                                                                                                                                                  |                                                                                                                                                                                                                                                                                                                                                                                                                                                                                                                                                                                                                           |
|       | C                                                                                                                                                                                                                                                                                                                                                | hsa04370:VEGF signaling pathway<br>hsa04664:Fc epsilon RI signaling pathway<br>hsa04914:Progesterone-mediated oocyte maturation<br>hsa04620:Toll-like receptor signaling pathway<br>hsa04660:T cell receptor signaling pathway<br>hsa04722:Neurotrophin signaling pathway<br>hsa04010:MAPK signaling pathway                                                                                                                                                                                                                                                                                                              |
|       |                                                                                                                                                                                                                                                                                                                                                  | hsa05219:Bladder cancer<br>hsa05216:Thyroid cancer<br>hsa04110:Cell cycle<br>hsa04350:TGF-beta signaling pathway<br>hsa04310:Wnt signaling pathway<br>hsa04010:MAPK signaling pathway<br>hsa05213:Endometrial cancer<br>hsa05221:Acute myeloid leukemia<br>hsa05220:Chronic myeloid leukemia                                                                                                                                                                                                                                                                                                                              |

|           |   |                                                                                                                                          |                                                                                                                                                                                                                                                                                                                                                                                                                                                                                                                                                                                                                           |
|-----------|---|------------------------------------------------------------------------------------------------------------------------------------------|---------------------------------------------------------------------------------------------------------------------------------------------------------------------------------------------------------------------------------------------------------------------------------------------------------------------------------------------------------------------------------------------------------------------------------------------------------------------------------------------------------------------------------------------------------------------------------------------------------------------------|
|           |   |                                                                                                                                          | hsa05210:Colorectal cancer<br>hsa05222:Small cell lung cancer<br>hsa04012:ErbB signaling pathway<br>hsa04630:Jak-STAT signaling pathway<br>hsa05200:Pathways in cancer                                                                                                                                                                                                                                                                                                                                                                                                                                                    |
|           |   |                                                                                                                                          | hsa05014:Amyotrophic lateral sclerosis (ALS)<br>hsa05120:Epithelial cell signaling in Helicobacter pylori infection<br>hsa04622:RIG-I-like receptor signaling pathway<br>hsa04621:NOD-like receptor signaling pathway<br>hsa04912:GnRH signaling pathway<br>hsa04670:Leukocyte transendothelial migration<br>hsa04370:VEGF signaling pathway<br>hsa04664:Fc epsilon RI signaling pathway<br>hsa04914:Progesterone-mediated oocyte maturation<br>hsa04620:Toll-like receptor signaling pathway<br>hsa04660:T cell receptor signaling pathway<br>hsa04722:Neurotrophin signaling pathway<br>hsa04010:MAPK signaling pathway |
| m376<br>3 | B | hsa05215:Prostate cancer                                                                                                                 |                                                                                                                                                                                                                                                                                                                                                                                                                                                                                                                                                                                                                           |
|           |   |                                                                                                                                          | hsa04370:VEGF signaling pathway<br>hsa04664:Fc epsilon RI signaling pathway<br>hsa04914:Progesterone-mediated oocyte maturation<br>hsa04620:Toll-like receptor signaling pathway<br>hsa04660:T cell receptor signaling pathway<br>hsa04722:Neurotrophin signaling pathway<br>hsa04010:MAPK signaling pathway                                                                                                                                                                                                                                                                                                              |
|           |   |                                                                                                                                          | hsa04612:Antigen processing and presentation<br>hsa04916:Melanogenesis<br>hsa05016:Huntington's disease<br>hsa05215:Prostate cancer                                                                                                                                                                                                                                                                                                                                                                                                                                                                                       |
| m385<br>7 | B | hsa04150:mTOR signaling pathway<br>hsa05213:Endometrial cancer<br>hsa05223:Non-small cell lung cancer<br>hsa05221:Acute myeloid leukemia | hsa04310:Wnt signaling pathway<br>hsa04114:Oocyte meiosis                                                                                                                                                                                                                                                                                                                                                                                                                                                                                                                                                                 |

---

|           |   |                                                                                                                                                                                                                                                                                                                                                                                                                                                                                                                                                                                                                                                                                                                                                                                                                                                       |                         |
|-----------|---|-------------------------------------------------------------------------------------------------------------------------------------------------------------------------------------------------------------------------------------------------------------------------------------------------------------------------------------------------------------------------------------------------------------------------------------------------------------------------------------------------------------------------------------------------------------------------------------------------------------------------------------------------------------------------------------------------------------------------------------------------------------------------------------------------------------------------------------------------------|-------------------------|
|           |   | hsa05214:Glioma<br>hsa05211:Renal cell carcinoma<br>hsa05218:Melanoma<br>hsa05212:Pancreatic cancer<br>hsa05220:Chronic myeloid leukemia<br>hsa04370:VEGF signaling pathway<br>hsa04662:B cell receptor signaling pathway<br>hsa04664:Fc epsilon RI signaling pathway<br>hsa05210:Colorectal cancer<br>hsa05222:Small cell lung cancer<br>hsa04914:Progesterone-mediated oocyte maturation<br>hsa04012:ErbB signaling pathway<br>hsa04210:Apoptosis<br>hsa05215:Prostate cancer<br>hsa04666:Fc gamma R-mediated phagocytosis<br>hsa04620:Toll-like receptor signaling pathway<br>hsa04660:T cell receptor signaling pathway<br>hsa04722:Neurotrophin signaling pathway<br>hsa04910:Insulin signaling pathway<br>hsa04630:Jak-STAT signaling pathway<br>hsa04062:Chemokine signaling pathway<br>hsa04510:Focal adhesion<br>hsa05200:Pathways in cancer |                         |
| m385<br>9 | B | hsa04150:mTOR signaling pathway<br>hsa05213:Endometrial cancer<br>hsa05223:Non-small cell lung cancer<br>hsa05221:Acute myeloid leukemia<br>hsa05214:Glioma<br>hsa05211:Renal cell carcinoma<br>hsa05218:Melanoma<br>hsa05212:Pancreatic cancer<br>hsa04662:B cell receptor signaling pathway<br>hsa04370:VEGF signaling pathway<br>hsa05220:Chronic myeloid leukemia<br>hsa04664:Fc epsilon RI                                                                                                                                                                                                                                                                                                                                                                                                                                                       | hsa04114:Oocyte meiosis |

---

|           |   |                                                                                                                                                                                                                                                                                                                                                                                                                                                                                                                                                                                                   |                                                                                                                                                                                                                                                                                                                                                                                                                                                                                                                                                                                                                           |
|-----------|---|---------------------------------------------------------------------------------------------------------------------------------------------------------------------------------------------------------------------------------------------------------------------------------------------------------------------------------------------------------------------------------------------------------------------------------------------------------------------------------------------------------------------------------------------------------------------------------------------------|---------------------------------------------------------------------------------------------------------------------------------------------------------------------------------------------------------------------------------------------------------------------------------------------------------------------------------------------------------------------------------------------------------------------------------------------------------------------------------------------------------------------------------------------------------------------------------------------------------------------------|
|           |   | signaling pathway<br>hsa05222:Small cell lung cancer<br>hsa05210:Colorectal cancer<br>hsa04914:Progesterone-mediated oocyte maturation<br>hsa04012:ErbB signaling pathway<br>hsa04210:Apoptosis<br>hsa05215:Prostate cancer<br>hsa04666:Fc gamma R-mediated phagocytosis<br>hsa04620:Toll-like receptor signaling pathway<br>hsa04660:T cell receptor signaling pathway<br>hsa04722:Neurotrophin signaling pathway<br>hsa04910:Insulin signaling pathway<br>hsa04630:Jak-STAT signaling pathway<br>hsa04062:Chemokine signaling pathway<br>hsa04510:Focal adhesion<br>hsa05200:Pathways in cancer |                                                                                                                                                                                                                                                                                                                                                                                                                                                                                                                                                                                                                           |
|           |   |                                                                                                                                                                                                                                                                                                                                                                                                                                                                                                                                                                                                   | hsa05014:Amyotrophic lateral sclerosis (ALS)<br>hsa04621:NOD-like receptor signaling pathway<br>hsa05120:Epithelial cell signaling in Helicobacter pylori infection<br>hsa04622:RIG-I-like receptor signaling pathway<br>hsa04912:GnRH signaling pathway<br>hsa04670:Leukocyte transendothelial migration<br>hsa04370:VEGF signaling pathway<br>hsa04664:Fc epsilon RI signaling pathway<br>hsa04914:Progesterone-mediated oocyte maturation<br>hsa04620:Toll-like receptor signaling pathway<br>hsa04660:T cell receptor signaling pathway<br>hsa04722:Neurotrophin signaling pathway<br>hsa04010:MAPK signaling pathway |
| m392<br>1 | B | hsa05215:Prostate cancer                                                                                                                                                                                                                                                                                                                                                                                                                                                                                                                                                                          |                                                                                                                                                                                                                                                                                                                                                                                                                                                                                                                                                                                                                           |
|           | C | hsa04370:VEGF signaling pathway<br>hsa04664:Fc epsilon RI signaling pathway                                                                                                                                                                                                                                                                                                                                                                                                                                                                                                                       | hsa04916:Melanogenesis<br>hsa04612:Antigen processing and presentation<br>hsa05016:Huntington's disease                                                                                                                                                                                                                                                                                                                                                                                                                                                                                                                   |

|           |   |                                                                                                                                                                                                                               |                                                                                                                                                                                                                                                                                                                                                                                                                                                                                                                                                                                                                                                                                                                                                                                                                                                                                                                                                                                                                |
|-----------|---|-------------------------------------------------------------------------------------------------------------------------------------------------------------------------------------------------------------------------------|----------------------------------------------------------------------------------------------------------------------------------------------------------------------------------------------------------------------------------------------------------------------------------------------------------------------------------------------------------------------------------------------------------------------------------------------------------------------------------------------------------------------------------------------------------------------------------------------------------------------------------------------------------------------------------------------------------------------------------------------------------------------------------------------------------------------------------------------------------------------------------------------------------------------------------------------------------------------------------------------------------------|
|           |   | hsa04914:Progesterone-mediated oocyte maturation<br>hsa04620:Toll-like receptor signaling pathway<br>hsa04660:T cell receptor signaling pathway<br>hsa04722:Neurotrophin signaling pathway<br>hsa04010:MAPK signaling pathway | hsa05215:Prostate cancer                                                                                                                                                                                                                                                                                                                                                                                                                                                                                                                                                                                                                                                                                                                                                                                                                                                                                                                                                                                       |
|           | A |                                                                                                                                                                                                                               | hsa05215:Prostate cancer                                                                                                                                                                                                                                                                                                                                                                                                                                                                                                                                                                                                                                                                                                                                                                                                                                                                                                                                                                                       |
| m392<br>5 | B | hsa04916:Melanogenesis<br>hsa05215:Prostate cancer                                                                                                                                                                            | hsa04630:Jak-STAT signaling pathway<br>hsa04530:Tight junction<br>hsa05222:Small cell lung cancer<br>hsa04920:Adipocytokine signaling pathway<br>hsa04210:Apoptosis<br>hsa05215:Prostate cancer<br>hsa04150:mTOR signaling pathway<br>hsa05213:Endometrial cancer<br>hsa05223:Non-small cell lung cancer<br>hsa05221:Acute myeloid leukemia<br>hsa05214:Glioma<br>hsa05211:Renal cell carcinoma<br>hsa05218:Melanoma<br>hsa05212:Pancreatic cancer<br>hsa04662:B cell receptor signaling pathway<br>hsa05220:Chronic myeloid leukemia<br>hsa04370:VEGF signaling pathway<br>hsa04664:Fc epsilon RI signaling pathway<br>hsa05210:Colorectal cancer<br>hsa04914:Progesterone-mediated oocyte maturation<br>hsa04012:ErbB signaling pathway<br>hsa04666:Fc gamma R-mediated phagocytosis<br>hsa04620:Toll-like receptor signaling pathway<br>hsa04660:T cell receptor signaling pathway<br>hsa04722:Neurotrophin signaling pathway<br>hsa04910:Insulin signaling pathway<br>hsa04062:Chemokine signaling pathway |



|           |   |                          |                                                                                                                                                                                                                                                                                                                                                                                                                                                                                                                                                                                                                                                                                                                                                                                                                                                                                                                                                                                             |
|-----------|---|--------------------------|---------------------------------------------------------------------------------------------------------------------------------------------------------------------------------------------------------------------------------------------------------------------------------------------------------------------------------------------------------------------------------------------------------------------------------------------------------------------------------------------------------------------------------------------------------------------------------------------------------------------------------------------------------------------------------------------------------------------------------------------------------------------------------------------------------------------------------------------------------------------------------------------------------------------------------------------------------------------------------------------|
|           |   |                          | hsa04510:Focal adhesion<br>hsa04010:MAPK signaling<br>pathway<br>hsa05200:Pathways in cancer                                                                                                                                                                                                                                                                                                                                                                                                                                                                                                                                                                                                                                                                                                                                                                                                                                                                                                |
|           |   |                          | hsa04150:mTOR signaling<br>pathway<br>hsa05213:Endometrial<br>cancer<br>hsa05223:Non-small cell<br>lung cancer<br>hsa05221:Acute myeloid<br>leukemia<br>hsa05214:Glioma<br>hsa05211:Renal cell<br>carcinoma<br>hsa05218:Melanoma<br>hsa05212:Pancreatic cancer<br>hsa04662:B cell receptor<br>signaling pathway<br>hsa05220:Chronic myeloid<br>leukemia<br>hsa04370:VEGF signaling<br>pathway<br>hsa04664:Fc epsilon RI<br>signaling pathway<br>hsa05210:Colorectal cancer<br>hsa04914:Progesterone-medi<br>ated oocyte maturation<br>hsa04012:ErbB signaling<br>pathway<br>hsa04666:Fc gamma<br>R-mediated phagocytosis<br>hsa04620:Toll-like receptor<br>signaling pathway<br>hsa04660:T cell receptor<br>signaling pathway<br>hsa04722:Neurotrophin<br>signaling pathway<br>hsa04910:Insulin signaling<br>pathway<br>hsa04062:Chemokine<br>signaling pathway<br>hsa04510:Focal adhesion<br>hsa04010:MAPK signaling<br>pathway<br>hsa05200:Pathways in cancer<br>hsa05215:Prostate cancer |
|           | C |                          | hsa04612:Antigen processing<br>and presentation<br>hsa05016:Huntington's disease<br>hsa05215:Prostate cancer<br>hsa04916:Melanogenesis                                                                                                                                                                                                                                                                                                                                                                                                                                                                                                                                                                                                                                                                                                                                                                                                                                                      |
| m392<br>7 | B | hsa05215:Prostate cancer | hsa04114:Oocyte meiosis<br>hsa04720:Long-term<br>potentiation<br>hsa04150:mTOR signaling<br>pathway<br>hsa04914:Progesterone-medi<br>ated oocyte maturation<br>hsa04722:Neurotrophin<br>signaling pathway<br>hsa04010:MAPK signaling                                                                                                                                                                                                                                                                                                                                                                                                                                                                                                                                                                                                                                                                                                                                                        |

|      |   | pathway                                                                                                                                                                                                                                                                                                                                                                                                                                                                                                                                                                                                                                                                                                                                                                                                                                                                                                                                                                                           |
|------|---|---------------------------------------------------------------------------------------------------------------------------------------------------------------------------------------------------------------------------------------------------------------------------------------------------------------------------------------------------------------------------------------------------------------------------------------------------------------------------------------------------------------------------------------------------------------------------------------------------------------------------------------------------------------------------------------------------------------------------------------------------------------------------------------------------------------------------------------------------------------------------------------------------------------------------------------------------------------------------------------------------|
|      | C | hsa04150:mTOR signaling pathway<br>hsa04914:Progesterone-mediated oocyte maturation<br>hsa04722:Neurotrophin signaling pathway<br>hsa04010:MAPK signaling pathway<br>hsa04612:Antigen processing and presentation<br>hsa05016:Huntington's disease<br>hsa04916:Melanogenesis<br>hsa05215:Prostate cancer                                                                                                                                                                                                                                                                                                                                                                                                                                                                                                                                                                                                                                                                                          |
| m392 | B | hsa05215:Prostate cancer<br>hsa05219:Bladder cancer<br>hsa04722:Neurotrophin signaling pathway<br>hsa04010:MAPK signaling pathway                                                                                                                                                                                                                                                                                                                                                                                                                                                                                                                                                                                                                                                                                                                                                                                                                                                                 |
| 8    | C | hsa04722:Neurotrophin signaling pathway<br>hsa04010:MAPK signaling pathway<br>hsa05016:Huntington's disease<br>hsa04916:Melanogenesis<br>hsa04612:Antigen processing and presentation<br>hsa05215:Prostate cancer                                                                                                                                                                                                                                                                                                                                                                                                                                                                                                                                                                                                                                                                                                                                                                                 |
|      | A | hsa05213:Endometrial cancer<br>hsa04150:mTOR signaling pathway<br>hsa05223:Non-small cell lung cancer<br>hsa05215:Prostate cancer<br>hsa04910:Insulin signaling pathway<br>hsa04510:Focal adhesion                                                                                                                                                                                                                                                                                                                                                                                                                                                                                                                                                                                                                                                                                                                                                                                                |
| m408 | C | hsa05221:Acute myeloid leukemia<br>hsa05214:Glioma<br>hsa05211:Renal cell carcinoma<br>hsa05218:Melanoma<br>hsa05212:Pancreatic cancer<br>hsa04662:B cell receptor signaling pathway<br>hsa05220:Chronic myeloid leukemia<br>hsa04370:VEGF signaling pathway<br>hsa04664:Fc epsilon RI signaling pathway<br>hsa05210:Colorectal cancer<br>hsa05222:Small cell lung cancer<br>hsa04914:Progesterone-mediated oocyte maturation<br>hsa04210:Apoptosis<br>hsa04012:ErbB signaling pathway<br>hsa04666:Fc gamma R-mediated phagocytosis<br>hsa04620:Toll-like receptor signaling pathway<br>hsa04660:T cell receptor signaling pathway<br>hsa04722:Neurotrophin signaling pathway<br>hsa04630:Jak-STAT<br>hsa03320:PPAR signaling pathway<br>hsa05213:Endometrial cancer<br>hsa04150:mTOR signaling pathway<br>hsa05223:Non-small cell lung cancer<br>hsa05215:Prostate cancer<br>hsa04910:Insulin signaling pathway<br>hsa04510:Focal adhesion<br>hsa04960:Aldosterone-regulated sodium reabsorption |
| 9    |   |                                                                                                                                                                                                                                                                                                                                                                                                                                                                                                                                                                                                                                                                                                                                                                                                                                                                                                                                                                                                   |

---

|   |                                                                                                                                                                                                                                                                                                               |                                                                                                                                                                                                                                                                                                                                                                                                                                                                                                                                                                                                                                                                       |
|---|---------------------------------------------------------------------------------------------------------------------------------------------------------------------------------------------------------------------------------------------------------------------------------------------------------------|-----------------------------------------------------------------------------------------------------------------------------------------------------------------------------------------------------------------------------------------------------------------------------------------------------------------------------------------------------------------------------------------------------------------------------------------------------------------------------------------------------------------------------------------------------------------------------------------------------------------------------------------------------------------------|
|   | signaling pathway<br>hsa04062:Chemokine<br>signaling pathway<br>hsa05200:Pathways in cancer<br>hsa05213:Endometrial<br>cancer<br>hsa04150:mTOR signaling<br>pathway<br>hsa05223:Non-small cell<br>lung cancer<br>hsa05215:Prostate cancer<br>hsa04910:Insulin signaling<br>pathway<br>hsa04510:Focal adhesion |                                                                                                                                                                                                                                                                                                                                                                                                                                                                                                                                                                                                                                                                       |
|   |                                                                                                                                                                                                                                                                                                               | hsa04530:Tight junction<br>hsa04920:Adipocytokine<br>signaling pathway<br>hsa04010:MAPK signaling<br>pathway<br>hsa05221:Acute myeloid<br>leukemia<br>hsa05214:Glioma<br>hsa05211:Renal cell<br>carcinoma<br>hsa05218:Melanoma<br>hsa05212:Pancreatic cancer<br>hsa04662:B cell receptor<br>signaling pathway<br>hsa05220:Chronic myeloid<br>leukemia                                                                                                                                                                                                                                                                                                                 |
| C | hsa04960:Aldosterone-regula<br>ted sodium reabsorption<br>hsa05213:Endometrial<br>cancer<br>hsa04150:mTOR signaling<br>pathway<br>hsa05223:Non-small cell<br>lung cancer<br>hsa05215:Prostate cancer<br>hsa04910:Insulin signaling<br>pathway<br>hsa04510:Focal adhesion                                      | hsa04370:VEGF signaling<br>pathway<br>hsa04664:Fc epsilon RI<br>signaling pathway<br>hsa05210:Colorectal cancer<br>hsa05222:Small cell lung<br>cancer<br>hsa04914:Progesterone-mediat<br>ed oocyte maturation<br>hsa04210:Apoptosis<br>hsa04012:ErbB signaling<br>pathway<br>hsa04666:Fc gamma<br>R-mediated phagocytosis<br>hsa04620:Toll-like receptor<br>signaling pathway<br>hsa04660:T cell receptor<br>signaling pathway<br>hsa04722:Neurotrophin<br>signaling pathway<br>hsa04630:Jak-STAT signaling<br>pathway<br>hsa04062:Chemokine<br>signaling pathway<br>hsa05200:Pathways in cancer<br>hsa05213:Endometrial cancer<br>hsa04150:mTOR signaling<br>pathway |

---

|      |   |                                                    |                                                                     |
|------|---|----------------------------------------------------|---------------------------------------------------------------------|
|      |   | hsa05223:Non-small cell lung cancer                |                                                                     |
|      |   | hsa05215:Prostate cancer                           |                                                                     |
|      |   | hsa04910:Insulin signaling pathway                 |                                                                     |
|      |   | hsa04510:Focal adhesion                            |                                                                     |
|      |   | hsa05211:Renal cell carcinoma                      |                                                                     |
|      |   | hsa04012:ErbB signaling pathway                    |                                                                     |
| A    |   | hsa04666:Fc gamma R-mediated phagocytosis          |                                                                     |
|      |   | hsa04660:T cell receptor signaling pathway         |                                                                     |
|      |   | hsa04062:Chemokine signaling pathway               |                                                                     |
|      |   | hsa04510:Focal adhesion                            |                                                                     |
|      |   | hsa04010:MAPK signaling pathway                    |                                                                     |
|      |   | hsa05213:Endometrial cancer                        |                                                                     |
|      |   | hsa05223:Non-small cell lung cancer                |                                                                     |
|      |   | hsa05221:Acute myeloid leukemia                    |                                                                     |
|      |   | hsa05214:Glioma                                    |                                                                     |
|      |   | hsa05218:Melanoma                                  |                                                                     |
|      |   | hsa05212:Pancreatic cancer                         |                                                                     |
|      |   | hsa04662:B cell receptor signaling pathway         | hsa05120:Epithelial cell signaling in Helicobacter pylori infection |
|      |   | hsa04370:VEGF signaling pathway                    | hsa04360:Axon guidance                                              |
|      |   | hsa05220:Chronic myeloid leukemia                  | hsa04650:Natural killer cell mediated cytotoxicity                  |
|      |   | hsa04664:Fc epsilon RI signaling pathway           | hsa04810:Regulation of actin cytoskeleton                           |
| m409 |   | hsa05210:Colorectal cancer                         | hsa05211:Renal cell carcinoma                                       |
| 6    |   | hsa04914:Progesterone-mediated oocyte maturation   | hsa04012:ErbB signaling pathway                                     |
|      | C | hsa05215:Prostate cancer                           | hsa04666:Fc gamma R-mediated phagocytosis                           |
|      |   | hsa04722:Neurotrophin signaling pathway            | hsa04660:T cell receptor signaling pathway                          |
|      |   | hsa04910:Insulin signaling pathway                 | hsa04062:Chemokine signaling pathway                                |
|      |   | hsa05200:Pathways in cancer                        | hsa04510:Focal adhesion                                             |
|      |   | hsa05211:Renal cell carcinoma                      | hsa04010:MAPK signaling pathway                                     |
|      |   | hsa04012:ErbB signaling pathway                    |                                                                     |
|      |   | hsa04666:Fc gamma R-mediated phagocytosis          |                                                                     |
|      |   | hsa04660:T cell receptor signaling pathway         |                                                                     |
|      |   | hsa04062:Chemokine signaling pathway               |                                                                     |
|      |   | hsa04510:Focal adhesion                            |                                                                     |
|      |   | hsa04010:MAPK signaling pathway                    |                                                                     |
|      |   | hsa04650:Natural killer cell mediated cytotoxicity | hsa04920:Adipocytokine signaling pathway                            |
|      | C | hsa04810:Regulation of actin cytoskeleton          | hsa04620:Toll-like receptor signaling pathway                       |
|      |   | hsa05211:Renal cell carcinoma                      | hsa04210:Apoptosis                                                  |

---

|  |                                            |                                                  |
|--|--------------------------------------------|--------------------------------------------------|
|  | carcinoma                                  | hsa05222:Small cell lung cancer                  |
|  | hsa04012:ErbB signaling pathway            | hsa04150:mTOR signaling pathway                  |
|  | hsa04666:Fc gamma R-mediated phagocytosis  | hsa04630:Jak-STAT signaling pathway              |
|  | hsa04660:T cell receptor signaling pathway | hsa04530:Tight junction                          |
|  | hsa04062:Chemokine signaling pathway       | hsa05213:Endometrial cancer                      |
|  | hsa04510:Focal adhesion                    | hsa05223:Non-small cell lung cancer              |
|  | hsa04010:MAPK signaling pathway            | hsa05221:Acute myeloid leukemia                  |
|  |                                            | hsa05214:Glioma                                  |
|  |                                            | hsa05218:Melanoma                                |
|  |                                            | hsa05212:Pancreatic cancer                       |
|  |                                            | hsa04662:B cell receptor signaling pathway       |
|  |                                            | hsa04370:VEGF signaling pathway                  |
|  |                                            | hsa05220:Chronic myeloid leukemia                |
|  |                                            | hsa04664:Fc epsilon RI signaling pathway         |
|  |                                            | hsa05210:Colorectal cancer                       |
|  |                                            | hsa04914:Progesterone-mediated oocyte maturation |
|  |                                            | hsa05215:Prostate cancer                         |
|  |                                            | hsa04722:Neurotrophin signaling pathway          |
|  |                                            | hsa04910:Insulin signaling pathway               |
|  |                                            | hsa05200:Pathways in cancer                      |
|  |                                            | hsa05211:Renal cell carcinoma                    |
|  |                                            | hsa04012:ErbB signaling pathway                  |
|  |                                            | hsa04666:Fc gamma R-mediated phagocytosis        |
|  |                                            | hsa04660:T cell receptor signaling pathway       |
|  |                                            | hsa04062:Chemokine signaling pathway             |
|  |                                            | hsa04510:Focal adhesion                          |
|  |                                            | hsa04010:MAPK signaling pathway                  |
|  |                                            | hsa04150:mTOR signaling pathway                  |
|  |                                            | hsa05213:Endometrial cancer                      |
|  |                                            | hsa05223:Non-small cell lung cancer              |
|  |                                            | hsa05221:Acute myeloid leukemia                  |
|  |                                            | hsa05214:Glioma                                  |
|  |                                            | hsa05211:Renal cell carcinoma                    |
|  |                                            | hsa05218:Melanoma                                |
|  |                                            | hsa05212:Pancreatic cancer                       |
|  |                                            | hsa04662:B cell receptor signaling pathway       |
|  |                                            | hsa05220:Chronic myeloid leukemia                |
|  |                                            | hsa04370:VEGF signaling pathway                  |
|  |                                            | hsa04664:Fc epsilon RI signaling pathway         |
|  |                                            | hsa05222:Small cell lung cancer                  |

---

m419  
5

A

---

|   |                                                  |                                                  |
|---|--------------------------------------------------|--------------------------------------------------|
|   | hsa05210:Colorectal cancer                       |                                                  |
|   | hsa04914:Progesterone-mediated oocyte maturation |                                                  |
|   | hsa04210:Apoptosis                               |                                                  |
|   | hsa04012:ErbB signaling pathway                  |                                                  |
|   | hsa05215:Prostate cancer                         |                                                  |
|   | hsa04666:Fc gamma R-mediated phagocytosis        |                                                  |
|   | hsa04620:Toll-like receptor signaling pathway    |                                                  |
|   | hsa04660:T cell receptor signaling pathway       |                                                  |
|   | hsa04722:Neurotrophin signaling pathway          |                                                  |
|   | hsa04910:Insulin signaling pathway               |                                                  |
|   | hsa04630:Jak-STAT signaling pathway              |                                                  |
|   | hsa04062:Chemokine signaling pathway             |                                                  |
|   | hsa04510:Focal adhesion                          |                                                  |
|   | hsa05200:Pathways in cancer                      |                                                  |
|   | <hr/>                                            |                                                  |
|   | hsa04150:mTOR signaling pathway                  | hsa04150:mTOR signaling pathway                  |
|   | hsa05213:Endometrial cancer                      | hsa05213:Endometrial cancer                      |
|   | hsa05223:Non-small cell lung cancer              | hsa05223:Non-small cell lung cancer              |
|   | hsa05221:Acute myeloid leukemia                  | hsa05221:Acute myeloid leukemia                  |
|   | hsa05214:Glioma                                  | hsa05214:Glioma                                  |
|   | hsa05211:Renal cell carcinoma                    | hsa05211:Renal cell carcinoma                    |
|   | hsa05218:Melanoma                                | hsa05218:Melanoma                                |
|   | hsa05212:Pancreatic cancer                       | hsa05212:Pancreatic cancer                       |
|   | hsa04662:B cell receptor signaling pathway       | hsa04662:B cell receptor signaling pathway       |
|   | hsa05220:Chronic myeloid leukemia                | hsa05220:Chronic myeloid leukemia                |
|   | hsa04370:VEGF signaling pathway                  | hsa04370:VEGF signaling pathway                  |
|   | hsa04664:Fc epsilon RI signaling pathway         | hsa04664:Fc epsilon RI signaling pathway         |
|   | hsa05222:Small cell lung cancer                  | hsa05222:Small cell lung cancer                  |
| B | hsa05210:Colorectal cancer                       | hsa05210:Colorectal cancer                       |
|   | hsa04914:Progesterone-mediated oocyte maturation | hsa04914:Progesterone-mediated oocyte maturation |
|   | hsa04210:Apoptosis                               | hsa04210:Apoptosis                               |
|   | hsa04012:ErbB signaling pathway                  | hsa04012:ErbB signaling pathway                  |
|   | hsa05215:Prostate cancer                         | hsa05215:Prostate cancer                         |
|   | hsa04666:Fc gamma R-mediated phagocytosis        | hsa04666:Fc gamma R-mediated phagocytosis        |
|   | hsa04620:Toll-like receptor signaling pathway    | hsa04620:Toll-like receptor signaling pathway    |
|   | hsa04660:T cell receptor signaling pathway       | hsa04660:T cell receptor signaling pathway       |
|   | hsa04722:Neurotrophin signaling pathway          | hsa04722:Neurotrophin signaling pathway          |
|   | hsa04910:Insulin signaling pathway               | hsa04910:Insulin signaling pathway               |
|   | hsa04630:Jak-STAT signaling pathway              | hsa04630:Jak-STAT signaling pathway              |
|   | hsa04062:Chemokine signaling pathway             | hsa04062:Chemokine signaling pathway             |
|   | hsa04510:Focal adhesion                          | hsa04510:Focal adhesion                          |

---

|   |                                                                                                                                                                                                                                                                                                                                                                                                                                                                                                                                                                                                                                                                                                                                                                                                                                                                                                                                                                    |                                                                                                                                                                                                                                                                                                                                                                                                                                                                                                                                                                                                                                                                                                                                                                                                                                                                                                                                                                                                   |
|---|--------------------------------------------------------------------------------------------------------------------------------------------------------------------------------------------------------------------------------------------------------------------------------------------------------------------------------------------------------------------------------------------------------------------------------------------------------------------------------------------------------------------------------------------------------------------------------------------------------------------------------------------------------------------------------------------------------------------------------------------------------------------------------------------------------------------------------------------------------------------------------------------------------------------------------------------------------------------|---------------------------------------------------------------------------------------------------------------------------------------------------------------------------------------------------------------------------------------------------------------------------------------------------------------------------------------------------------------------------------------------------------------------------------------------------------------------------------------------------------------------------------------------------------------------------------------------------------------------------------------------------------------------------------------------------------------------------------------------------------------------------------------------------------------------------------------------------------------------------------------------------------------------------------------------------------------------------------------------------|
|   | hsa04510:Focal adhesion<br>hsa05200:Pathways in cancer                                                                                                                                                                                                                                                                                                                                                                                                                                                                                                                                                                                                                                                                                                                                                                                                                                                                                                             | hsa05200:Pathways in cancer<br>hsa04960:Aldosterone-regulated sodium reabsorption<br>hsa04930:Type II diabetes mellitus<br>hsa04070:Phosphatidylinositol signaling system<br>hsa04670:Leukocyte transendothelial migration<br>hsa04650:Natural killer cell mediated cytotoxicity<br>hsa04810:Regulation of actin cytoskeleton                                                                                                                                                                                                                                                                                                                                                                                                                                                                                                                                                                                                                                                                     |
| B | hsa04150:mTOR signaling pathway<br>hsa05213:Endometrial cancer<br>hsa05223:Non-small cell lung cancer<br>hsa05221:Acute myeloid leukemia<br>hsa05214:Glioma<br>hsa05211:Renal cell carcinoma<br>hsa05218:Melanoma<br>hsa05212:Pancreatic cancer<br>hsa04662:B cell receptor signaling pathway<br>hsa05220:Chronic myeloid leukemia<br>hsa04370:VEGF signaling pathway<br>hsa04664:Fc epsilon RI signaling pathway<br>hsa05222:Small cell lung cancer<br>hsa05210:Colorectal cancer<br>hsa04914:Progesterone-mediated oocyte maturation<br>hsa04210:Apoptosis<br>hsa04012:ErbB signaling pathway<br>hsa05215:Prostate cancer<br>hsa04666:Fc gamma R-mediated phagocytosis<br>hsa04620:Toll-like receptor signaling pathway<br>hsa04660:T cell receptor signaling pathway<br>hsa04722:Neurotrophin signaling pathway<br>hsa04910:Insulin signaling pathway<br>hsa04630:Jak-STAT signaling pathway<br>hsa04062:Chemokine signaling pathway<br>hsa04510:Focal adhesion | hsa04530:Tight junction<br>hsa04010:MAPK signaling pathway<br>hsa04920:Adipocytokine signaling pathway<br>hsa04150:mTOR signaling pathway<br>hsa05213:Endometrial cancer<br>hsa05223:Non-small cell lung cancer<br>hsa05221:Acute myeloid leukemia<br>hsa05214:Glioma<br>hsa05211:Renal cell carcinoma<br>hsa05218:Melanoma<br>hsa05212:Pancreatic cancer<br>hsa04662:B cell receptor signaling pathway<br>hsa05220:Chronic myeloid leukemia<br>hsa04370:VEGF signaling pathway<br>hsa04664:Fc epsilon RI signaling pathway<br>hsa05222:Small cell lung cancer<br>hsa05210:Colorectal cancer<br>hsa04914:Progesterone-mediated oocyte maturation<br>hsa04210:Apoptosis<br>hsa04012:ErbB signaling pathway<br>hsa05215:Prostate cancer<br>hsa04666:Fc gamma R-mediated phagocytosis<br>hsa04620:Toll-like receptor signaling pathway<br>hsa04660:T cell receptor signaling pathway<br>hsa04722:Neurotrophin signaling pathway<br>hsa04910:Insulin signaling pathway<br>hsa04630:Jak-STAT signaling |

---

|   |                                                    |                                                    |
|---|----------------------------------------------------|----------------------------------------------------|
|   | hsa05200:Pathways in cancer pathway                |                                                    |
|   | hsa04960:Aldosterone-regulated sodium reabsorption | hsa04062:Chemokine signaling pathway               |
|   | hsa04930:Type II diabetes mellitus                 | hsa04510:Focal adhesion                            |
|   | hsa04070:Phosphatidylinositol signaling system     | hsa05200:Pathways in cancer                        |
|   | hsa04670:Leukocyte transendothelial migration      |                                                    |
|   | hsa04650:Natural killer cell mediated cytotoxicity |                                                    |
|   | hsa04810:Regulation of actin cytoskeleton          |                                                    |
|   | <hr/>                                              |                                                    |
|   | hsa04150:mTOR signaling pathway                    |                                                    |
|   | hsa05213:Endometrial cancer                        |                                                    |
|   | hsa05223:Non-small cell lung cancer                |                                                    |
|   | hsa05221:Acute myeloid leukemia                    |                                                    |
|   | hsa05214:Glioma                                    |                                                    |
|   | hsa05211:Renal cell carcinoma                      |                                                    |
|   | hsa05218:Melanoma                                  |                                                    |
|   | hsa05212:Pancreatic cancer                         |                                                    |
|   | hsa04662:B cell receptor signaling pathway         |                                                    |
|   | hsa05220:Chronic myeloid leukemia                  |                                                    |
|   | hsa04370:VEGF signaling pathway                    | hsa04960:Aldosterone-regulated sodium reabsorption |
|   | hsa04664:Fc epsilon RI signaling pathway           | hsa04930:Type II diabetes mellitus                 |
|   | hsa05222:Small cell lung cancer                    | hsa04070:Phosphatidylinositol signaling system     |
| C | hsa05210:Colorectal cancer                         | hsa04670:Leukocyte transendothelial migration      |
|   | hsa04914:Progesterone-mediated oocyte maturation   | hsa04650:Natural killer cell mediated cytotoxicity |
|   | hsa04210:Apoptosis                                 | hsa04810:Regulation of actin cytoskeleton          |
|   | hsa04012:ErbB signaling pathway                    |                                                    |
|   | hsa05215:Prostate cancer                           |                                                    |
|   | hsa04666:Fc gamma R-mediated phagocytosis          |                                                    |
|   | hsa04620:Toll-like receptor signaling pathway      |                                                    |
|   | hsa04660:T cell receptor signaling pathway         |                                                    |
|   | hsa04722:Neurotrophin signaling pathway            |                                                    |
|   | hsa04910:Insulin signaling pathway                 |                                                    |
|   | hsa04630:Jak-STAT signaling pathway                |                                                    |
|   | hsa04062:Chemokine signaling pathway               |                                                    |
|   | hsa04510:Focal adhesion                            |                                                    |

---



---

hsa05200:Pathways in cancer  
hsa04150:mTOR signaling  
pathway  
hsa05213:Endometrial  
cancer  
hsa05223:Non-small cell  
lung cancer  
hsa05221:Acute myeloid  
leukemia  
hsa05214:Glioma  
hsa05211:Renal cell  
carcinoma  
hsa05218:Melanoma  
hsa05212:Pancreatic cancer  
hsa04662:B cell receptor  
signaling pathway  
hsa05220:Chronic myeloid  
leukemia  
hsa04370:VEGF signaling  
pathway  
hsa04664:Fc epsilon RI  
signaling pathway  
hsa05222:Small cell lung  
cancer  
hsa05210:Colorectal cancer  
hsa04914:Progesterone-medi  
ated oocyte maturation  
hsa04210:Apoptosis  
hsa04012:ErbB signaling  
pathway  
hsa05215:Prostate cancer  
hsa04666:Fc gamma  
R-mediated phagocytosis  
hsa04620:Toll-like receptor  
signaling pathway  
hsa04660:T cell receptor  
signaling pathway  
hsa04722:Neurotrophin  
signaling pathway  
hsa04910:Insulin signaling  
pathway  
hsa04630:Jak-STAT  
signaling pathway  
hsa04062:Chemokine  
signaling pathway  
hsa04510:Focal adhesion  
hsa05200:Pathways in cancer

---

<sup>a</sup> Cross-talk types are *A*) three vertices of a motif in one pathway; *B*) three vertices of a motif in two pathways connected by one edge and *C*) three vertices of a motif in two pathways connected by two edges.

<sup>b</sup> There is no pathway for the molecule in the KEGG database at present.
