# Supplementary material for: Cancer-related marketing centrality motifs acting as pivot units in the human signaling network and mediating cross-talk between biological pathways
Source: Royal Society of Chemistry journal article supplement (doi:10.1039/c3mb70289h), 2013-09-04
Supplement: c3mb70289h_6.pdf [file c3mb70289h_6.pdf]

**Table S5. Literature of association between non-cancer genes or complexes in cancer-related marketing centrality motifs and cancers.**

| <b>Complex or gene</b>      | <b>Cancer</b>                   | <b>Literature</b>                                                                                                                                                         |
|-----------------------------|---------------------------------|---------------------------------------------------------------------------------------------------------------------------------------------------------------------------|
| RPS6KB1                     | breast cancer                   | Transcriptional consequences of genomic structural aberrations in breast cancer                                                                                           |
|                             | diffuse large B-cell lymphoma   | Phospho-p70S6K/p85S6K and cdc2/cdk1 are novel targets for diffuse large B-cell lymphoma combination therapy                                                               |
|                             | endometrial cancers             | Genome-wide analysis of deoxyribonucleic acid in endometrial cancer using comparative genomic hybridization microarrays                                                   |
|                             | desmoplastic medulloblastoma    | Comprehensive genomic analysis of desmoplastic medulloblastomas: identification of novel amplified genes and separate evaluation of the different histological components |
| ERK1/2<br>(MAPK1 and MAPK3) | breast cancer                   | Increased expression of CYP4Z1 promotes tumor angiogenesis and growth in human breast cancer                                                                              |
|                             | gastric cancer                  | ERK inhibition enhances TSA-induced gastric cancer cell apoptosis via NF- $\kappa$ B-dependent and Notch-independent mechanism                                            |
|                             | colorectal cancer               | Lyn is involved in CD24-induced ERK1/2 activation in colorectal cancer                                                                                                    |
|                             | lung cancer                     | Caveolin-1 interferes cell growth of lung cancer NCI-H446 cell through the interactions with phospho-ERK1/2, estrogen receptor and progesterin receptor                   |
| PHLPP1                      | tumor suppressor                | USP1 regulates AKT phosphorylation by modulating the stability of PHLPP1 in lung cancer cells                                                                             |
| GRB2                        | endometrial carcinoma           | Insulin promotes proliferation, survival, and invasion in endometrial carcinoma by activating the MEK/ERK pathway                                                         |
|                             | colorectal cancer               | Proteomics identification of ITGB3 as a key regulator in reactive oxygen species-induced migration and invasion of colorectal cancer cells                                |
|                             | anaplastic large cell lymphomas | Involvement of Grb2 adaptor protein in nucleophosmin-anaplastic lymphoma kinase (NPM-ALK)-mediated signaling and anaplastic large cell lymphoma growth                    |
| PDK2                        | breast cancer                   | Genetic variation in genes involved in                                                                                                                                    |

|        |                                   |                                                                                                                                                 |
|--------|-----------------------------------|-------------------------------------------------------------------------------------------------------------------------------------------------|
|        |                                   | hormones, inflammation and energetic factors and breast cancer risk in an admixed population                                                    |
| INPPL1 | laryngeal squamous cell carcinoma | Prognostic value of elevated SHIP2 expression in laryngeal squamous cell carcinoma                                                              |
|        | breast cancer                     | SHIP2 phosphoinositol phosphatase positively regulates EGFR-Akt pathway, CXCR4 expression, and cell migration in MDA-MB-231 breast cancer cells |
|        | hepatocellular carcinoma          | Significance of glucose intolerance and SHIP2 expression in hepatocellular carcinoma patients with HCV infection                                |
| PRKCZ  | prostate cancer                   | Splice variant PRKC- $\zeta$ (-PrC) is a novel biomarker of human prostate cancer                                                               |
|        | Oral squamous cell carcinoma      | Array-comparative genomic hybridization to detect genomewide changes in microdissected primary and metastatic oral squamous cell carcinomas     |
| RHOA   | lung cancer                       | Downregulating PRL-3 inhibit migration and invasion of lung cancer cell via RhoA and mDia1                                                      |
|        | breast cancer                     | Dvl2-dependent activation of Daam1 and RhoA regulates Wnt5a-induced breast cancer cell migration                                                |
|        | prostate cancer                   | RhoA as a mediator of clinically relevant androgen action in prostate cancer cells                                                              |
| PDK1   | breast cancer                     | 3-Phosphoinositide-dependent kinase 1 potentiates upstream lesions on the phosphatidylinositol 3-kinase pathway in breast carcinoma             |
|        | oral squamous cell carcinoma      | Involvement of TSC genes and differential expression of other members of the mTOR signaling pathway in oral squamous cell carcinoma             |
| ILK    | bladder cancer                    | Downregulation of integrin-linked kinase inhibits epithelial-to-mesenchymal transition and metastasis in bladder cancer cells                   |
|        | ovarian carcinoma                 | Silencing of the integrin-linked kinase gene induces the apoptosis in ovarian carcinoma                                                         |
|        | gastric cancer                    | Integrin-linked kinase in gastric cancer cell attachment, invasion and tumor growth                                                             |
|        | colon cancer                      | MicroRNA-mediated upregulation of integrin-linked kinase promotes Src-induced                                                                   |

|       |                                  |                                                                                                                                                                                                      |
|-------|----------------------------------|------------------------------------------------------------------------------------------------------------------------------------------------------------------------------------------------------|
|       |                                  | tumor progression                                                                                                                                                                                    |
|       | breast cancer                    | Angiopoietin-2, an angiogenic regulator, promotes initial growth and survival of breast cancer metastases to the lung through the integrin-linked kinase (ILK)-AKT-B cell lymphoma 2 (Bcl-2) pathway |
|       | breast cancer                    | Cancer stem cell markers in breast cancer: pathological, clinical and prognostic significance                                                                                                        |
|       | prostate cancer                  | Prostate cancer susceptibility variants confer increased risk of disease progression                                                                                                                 |
| ITGA6 | renal cell carcinoma             | Alterations of the gene expression profile in renal cell carcinoma after treatment with the histone deacetylase-inhibitor valproic acid and interferon-alpha                                         |
|       | cervical squamous cell carcinoma | Gene profiling in Pap-cell smears of high-risk human papillomavirus-positive squamous cervical carcinoma                                                                                             |
|       | hepatocellular carcinoma         | Different molecular pathways determining extrahepatic and intrahepatic recurrences of hepatocellular carcinoma                                                                                       |
| ITGB4 | breast cancer                    | Vimentin regulates EMT induction by Slug and oncogenic H-Ras and migration by governing Axl expression in breast cancer                                                                              |
|       | ovarian cancer                   | Gene expression profiling in response to estradiol and genistein in ovarian cancer cells                                                                                                             |
| LAMA5 | cervical cancer                  | Identification of copy number gain and overexpressed genes on chromosome arm 20q by an integrative genomic approach in cervical cancer: potential role in progression                                |
| LAMC1 | breast cancer                    | Genetic expression profiles and chromosomal alterations in sporadic breast cancer in Mexican women                                                                                                   |
|       | hepatocellular carcinomas        | Sp1-mediated transactivation of LamC1 promoter and coordinated expression of laminin-gamma1 and Sp1 in human hepatocellular carcinomas                                                               |
|       | colon cancer                     | Recurrent R-spondin fusions in colon cancer                                                                                                                                                          |
| ERBB3 | breast cancer                    | Gene expression changes as markers of early lapatinib response in a panel of breast cancer cell lines                                                                                                |
|       | lung cancer                      | Tumor suppressor miR-22 suppresses lung cancer cell progression through post-transcriptional regulation of ErbB3                                                                                     |

|                                                   |                                     |                                                                                                                                                  |
|---------------------------------------------------|-------------------------------------|--------------------------------------------------------------------------------------------------------------------------------------------------|
| mTORC2<br>(MTOR,<br>RICTOR,<br>MLST8,<br>MAPKAP1) | prostate cancer                     | Dual targeting of the Akt/mTOR signaling pathway inhibits castration-resistant prostate cancer in a genetically engineered mouse model           |
|                                                   | breast cancer                       | Targeting of mTORC2 prevents cell migration and promotes apoptosis in breast cancer                                                              |
|                                                   | glioblastoma                        | Oncogenic EGFR signaling activates an mTORC2-NF- $\kappa$ B pathway that promotes chemotherapy resistance                                        |
|                                                   | intravascular large B-cell lymphoma | Intravascular large B-cell lymphoma: report of three cases and analysis of the mTOR pathway                                                      |
| AURKA                                             | prostate cancer                     | Understanding the lethal variant of prostate cancer: power of examining extremes                                                                 |
|                                                   | neuroblastoma                       | Protein tyrosine phosphatase receptor delta acts as a neuroblastoma tumor suppressor by destabilizing the aurora kinase A oncogene               |
|                                                   | colorectal cancer                   | Relationship of increased aurora kinase A gene copy number, prognosis and response to chemotherapy in patients with metastatic colorectal cancer |
|                                                   | gastrointestinal stromal tumor      | Mitotic checkpoints and chromosome instability are strong predictors of clinical outcome in gastrointestinal stromal tumors                      |
| GRB10                                             | mammary carcinogenesis              | Critical involvement of RQCD1 in the EGFR-Akt pathway in mammary carcinogenesis                                                                  |
|                                                   | breast cancer                       | Involvement of RQCD1 overexpression, a novel cancer-testis antigen, in the Akt pathway in breast cancer cells                                    |
|                                                   | glioblastoma                        | Characterization of novel and complex genomic aberrations in glioblastoma using a 32K BAC array                                                  |
|                                                   | osteosarcoma                        | Changes in genomic imprinting and gene expression associated with transformation in a model of human osteosarcoma                                |
| PRKDC                                             | cervical squamous cell carcinoma    | Up-regulation of growth factor receptor-bound protein 10 in cervical squamous cell carcinoma                                                     |
|                                                   | breast cancer                       | Genetic variation in DNA repair gene XRCC7 (G6721T) and susceptibility to breast cancer                                                          |
|                                                   | melanoma                            | Genetic variants in DNA repair genes and the risk of cutaneous malignant melanoma in melanoma-prone families with/without                        |

|       |                             |                                                                                                                                                          |
|-------|-----------------------------|----------------------------------------------------------------------------------------------------------------------------------------------------------|
|       |                             | CDKN2A mutations                                                                                                                                         |
| EDNRA | nasopharyngeal carcinoma    | Polymorphisms in the endothelin-1 and endothelin a receptor genes and survival in patients with locoregionally advanced nasopharyngeal carcinoma         |
|       | Wilms tumors                | Target genes of the WNT/beta-catenin pathway in Wilms tumors                                                                                             |
| EDN1  | breast cancer               | Mechanisms of indomethacin-induced alterations in the choline phospholipid metabolism of breast cancer cells                                             |
|       | colon cancer                | beta-Catenin activates the growth factor endothelin-1 in colon cancer cells                                                                              |
| ESR1  | breast cancer               | TWIST represses estrogen receptor-alpha expression by recruiting the NuRD protein complex in breast cancer cell                                          |
|       | endometrial cancer          | Genetic polymorphisms in the estrogen receptor- $\alpha$ gene and the risk of endometrial cancer: a meta-analysis                                        |
|       | testicular germ cell cancer | Association of polymorphisms in genes encoding hormone receptors ESR1, ESR2 and LHCGR with the risk and clinical features of testicular germ cell cancer |
| STRN  | bladder and lung cancer     | Transcription activating property of autoantigen SG2NA and modulating effect of WD-40 repeats                                                            |
| INSR  | endometrial cancer          | Mitogenic and anti-apoptotic effects of insulin in endometrial cancer are phosphatidylinositol 3-kinase/Akt dependent                                    |
|       | breast cancer               | A kinome-wide screen identifies the insulin/IGF-I receptor pathway as a mechanism of escape from hormone dependence in breast cancer                     |
|       | colorectal neoplasia        | Genes in the insulin and insulin-like growth factor pathway and odds of metachronous colorectal neoplasia                                                |
|       | multiple myeloma            | Insulin is a potent myeloma cell growth factor through insulin/IGF-1 hybrid receptor activation                                                          |
|       | thyroid cancer              | The insulin resistance Grb14 adaptor protein promotes thyroid cancer ret signaling and progression                                                       |
| GRB14 | breast cancer               | Solution structure of the human Grb14-SH2 domain and comparison with the structures of the human Grb7-SH2/erbB2 peptide complex                          |

|          |                                 |                                                                                                                                                                                             |
|----------|---------------------------------|---------------------------------------------------------------------------------------------------------------------------------------------------------------------------------------------|
|          |                                 | and human Grb10-SH2 domain                                                                                                                                                                  |
|          | prostate cancer                 | Cloning and characterization of GRB14, a novel member of the GRB7 gene family                                                                                                               |
|          | melanoma                        | Exome sequencing identifies recurrent somatic RAC1 mutations in melanoma                                                                                                                    |
| RAC1     | pancreatic cancer               | BART inhibits pancreatic cancer cell invasion by Rac1 inactivation through direct binding to active Rac1                                                                                    |
|          | medulloblastoma tumors          | Rho GTPases in primary brain tumor malignancy and invasion                                                                                                                                  |
|          | breast cancer                   | Comprehensive molecular portraits of human breast tumours                                                                                                                                   |
| MAP3K1   | colorectal cancer               | MAP3K1 functionally interacts with Axin1 in the canonical Wnt signalling pathway                                                                                                            |
|          | pancreatic cancer               | Association of breast cancer susceptibility variants with risk of pancreatic cancer                                                                                                         |
|          | lung cancer                     | A functional copy-number variation in MAPKAPK2 predicts risk and prognosis of lung cancer                                                                                                   |
| MAPKAPK2 | gastrointestinal stromal tumor  | MAPKAP kinase 2 overexpression influences prognosis in gastrointestinal stromal tumors and associates with copy number variations on chromosome 1 and expression of p38 MAP kinase and ETV1 |
|          | bladder cancer                  | p38 mitogen-activated protein kinase-driven MAPKAPK2 regulates invasion of bladder cancer by modulation of MMP-2 and MMP-9 activity                                                         |
|          | transformed follicular lymphoma | Comparison of gene expression profiles of lymphoma cell lines from transformed follicular lymphoma, Burkitt's lymphoma and de novo diffuse large B-cell lymphoma                            |
| CAMK1    | aldosterone producing adenomas  | Aldosterone producing adrenal adenomas are characterized by activation of calcium/calmodulin-dependent protein kinase (CaMK) dependent pathways                                             |
|          | endometrial carcinomas          | Targeting calcium/calmodulin-dependence kinase I and II as a potential anti-proliferation remedy for endometrial carcinomas                                                                 |
|          | cerebral cavernous malformation | CCM2 gene polymorphisms in Italian sporadic patients with cerebral cavernous malformation: a case-control study                                                                             |
| KRIT1    | retinal cavernous hemangioma    | Novel KRIT1/CCM1 mutation in a patient with retinal cavernous hemangioma and                                                                                                                |

|                                      |                          |                                                                                                                                                             |
|--------------------------------------|--------------------------|-------------------------------------------------------------------------------------------------------------------------------------------------------------|
|                                      |                          | cerebral cavernous malformation                                                                                                                             |
| MAPK8                                | breast cancer            | Estrogen regulates JNK1 genomic localization to control gene expression and cell growth in breast cancer cells                                              |
|                                      | prostate cancer          | JunD-mediated repression of GADD45 $\alpha$ and $\gamma$ regulates escape from cell death in prostate cancer                                                |
| p38 (MAPK11, MAPK12, MAPK13, MAPK14) | renal cancer             | Comparison of tumor grade and stage with nuclear factor kappa b and p38 mitogene activated protein kinase expressions in renal cell cancer                  |
|                                      | medulloblastoma          | Voltage-gated potassium channel EAG2 controls mitotic entry and tumor growth in medulloblastoma via regulating cell volume dynamics                         |
|                                      | squamous cell carcinomas | Combined inhibition of p38 and Akt signaling pathways abrogates cyclosporine A-mediated pathogenesis of aggressive skin SCCs                                |
| RPS6KA1                              | colon cancer             | Genetic variation in RPS6KA1, RPS6KA2, RPS6KB1, RPS6KB2, and PDK1 and risk of colon or rectal cancer                                                        |
|                                      | breast cancer            | Y-box binding protein-1 serine 102 is a downstream target of p90 ribosomal S6 kinase in basal-like breast cancer cells                                      |
|                                      | melanoma                 | Mitogen-activated protein kinase pathway-dependent tumor-specific survival signaling in melanoma cells through inactivation of the proapoptotic protein bad |
| PAK1                                 | hepatocellular carcinoma | Hepatitis B virus X protein confers resistance of hepatoma cells to anoikis by up-regulating and activating p21-activated kinase 1                          |
|                                      | colon cancer             | Phosphorylation of $\beta$ -catenin at serine 663 regulates its transcriptional activity                                                                    |
|                                      | gastric cancer           | P21-activated protein kinase 1 is overexpressed in gastric cancer and induces cancer metastasis                                                             |
|                                      | breast cancer            | PAK1 is a breast cancer oncogene that coordinately activates MAPK and MET signaling                                                                         |
